# Supplementary material for: Cortical Morphology Differences in Subjects at Increased Vulnerability for Developing a Psychotic Disorder: A Comparison between Subjects with Ultra-High Risk and 22q11.2 Deletion Syndrome
Source: PLoS One. 2016 Nov 9;11(11):e0159928. doi: 10.1371/journal.pone.0159928 (PMC5102447; doi:10.1371/journal.pone.0159928)
Supplement: S1 File — (XLSX) [file pone.0159928.s001.xlsx]

## Sheet: lGI_stats_LH
X1	X2	X3	X4	X5	X6	X7	X8	X9	X10	X11	X12	X13	X14	X15	X16	X17	X18	X19	X20	X21	X22	X23	X24	X25	X26	X27	X28	X29	X30	X31	X32	X33	X34	X35
	bankssts	caudalanteriorcingulate	caudalmiddlefrontal	cuneus	entorhinal	fusiform	inferiorparietal	inferiortemporal	isthmuscingulate	lateraloccipital	lateralorbitofrontal	lingual	medialorbitofrontal	middletemporal	parahippocampal	paracentral	parsopercularis	parsorbitalis	parstriangularis	pericalcarine	postcentral	posteriorcingulate	precentral	precuneus	rostralanteriorcingulate	rostralmiddlefrontal	superiorfrontal	superiorparietal	superiortemporal	supramarginal	frontalpole	temporalpole	transversetemporal	insula
/scratch/imbakker/gmv_gyri/output_freesurfer_5_3/lh.aparc.pial_lgi.stats	3.2664	1.6071	3.063	2.4529	2.3035	2.5255	3.2253	2.5276	2.4327	2.6964	2.2203	2.4918	1.652	3.1471	2.5005	2.0627	4.0229	2.8133	3.3768	2.3842	3.4295	1.8062	3.3562	2.449	1.639	2.5123	2.0412	2.9316	4.0391	3.6078	1.7152	2.3392	4.5516	4.2468
/scratch/imbakker/gmv_gyri/output_freesurfer_5_3/1_002_PRG/stats/lh.aparc.pial_lgi.stats	3.7419	1.8984	3.3568	2.7626	2.5708	2.5958	3.3906	2.6434	2.6744	2.4405	2.369	2.7125	1.9788	3.0923	2.7442	2.3646	4.1819	2.6438	3.4457	2.7678	3.6217	2.148	3.616	2.9545	1.9841	2.814	2.197	2.9591	3.882	3.9727	1.9509	2.3637	4.8366	4.0963
/scratch/imbakker/gmv_gyri/output_freesurfer_5_3/1_003_PRG/stats/lh.aparc.pial_lgi.stats	3.6698	2.0488	3.3859	3.0847	2.4548	2.6222	3.3721	2.8469	2.8392	2.6731	2.6373	2.8381	2.0711	3.5986	2.5588	2.5226	4.674	2.9658	3.9263	2.9452	3.6371	2.288	3.7034	3.0868	2.1331	3.0059	2.3004	3.0515	4.4676	3.7475	1.9908	2.6629	4.8582	4.5142
/scratch/imbakker/gmv_gyri/output_freesurfer_5_3/1_005_PRG/stats/lh.aparc.pial_lgi.stats	3.7868	1.8665	3.2198	2.6525	2.349	2.5421	3.1861	2.6855	2.5203	2.4117	2.3327	2.7497	1.8851	3.2864	2.6163	2.3219	3.923	2.814	3.4057	2.7493	3.6323	2.0814	3.4413	2.7167	1.896	2.6507	2.0582	2.8907	4.0406	3.6959	1.862	2.2122	4.6631	4.0743
/scratch/imbakker/gmv_gyri/output_freesurfer_5_3/1_006_PRG/stats/lh.aparc.pial_lgi.stats	3.657	1.826	3.159	2.9402	2.4491	2.5024	3.366	2.8245	2.853	2.4491	2.5308	2.5104	1.9301	3.4712	2.5352	2.5357	3.9131	2.9746	3.3659	2.7357	3.6201	2.3923	3.5013	3.0512	1.8936	2.7038	2.1262	2.8968	4.1895	3.6678	1.8191	2.3561	4.8637	4.2884
/scratch/imbakker/gmv_gyri/output_freesurfer_5_3/1_007_PRG/stats/lh.aparc.pial_lgi.stats	3.421	1.9313	3.1222	2.586	2.4045	2.6271	3.2464	2.4978	2.7437	2.4503	2.619	2.7862	1.9928	3.2125	2.7976	2.2831	4.0006	2.759	3.4074	2.635	3.3859	2.3036	3.2541	2.7847	2.0235	2.6481	2.2394	2.7932	3.9309	3.6359	1.8961	2.2823	4.2903	4.2049
/scratch/imbakker/gmv_gyri/output_freesurfer_5_3/1_009_PRG/stats/lh.aparc.pial_lgi.stats	3.613	1.6828	3.3466	2.7007	2.5173	2.5963	3.2141	2.8057	2.6126	2.5414	2.5852	2.5388	1.9584	3.6387	2.5836	2.262	4.593	2.9616	3.8683	2.5171	3.5731	2.1025	3.6027	2.7532	1.89	2.7505	2.1689	3.0789	4.5033	3.5523	1.9425	2.5198	4.8495	4.7546
/scratch/imbakker/gmv_gyri/output_freesurfer_5_3/1_010_PRG/stats/lh.aparc.pial_lgi.stats	3.6839	1.9881	3.4369	3.0297	2.5148	2.6224	3.2859	2.5376	2.6832	2.6012	2.6479	2.7836	1.9532	3.3183	2.7516	2.3321	4.4028	3.2032	3.8197	2.86	3.9323	2.1259	3.808	2.9312	2.0087	2.5535	2.1215	3.1772	4.4306	4.0782	1.8083	2.4568	5.3325	4.743
/scratch/imbakker/gmv_gyri/output_freesurfer_5_3/1_011_PRG/stats/lh.aparc.pial_lgi.stats	4.0341	1.7607	3.2842	2.9705	2.3922	2.6516	3.3012	2.8737	2.5166	2.6381	2.7561	2.6042	1.9774	3.7059	2.625	2.1851	4.3901	3.2134	3.7516	2.7897	3.6918	2.0384	3.6698	2.8486	1.8955	2.5855	2.054	2.9358	4.3966	3.7584	1.9456	2.4113	5.0055	4.7078
/scratch/imbakker/gmv_gyri/output_freesurfer_5_3/1_012_PRG/stats/lh.aparc.pial_lgi.stats	3.4968	1.8531	3.1797	2.9104	2.47	2.5281	3.0406	2.6263	2.6377	2.4623	2.6847	2.8407	2.0039	3.2826	2.6938	2.3058	3.7535	3.1085	3.601	2.8342	3.4971	2.1756	3.4191	2.9088	1.9836	2.5347	2.1287	2.8763	4.0656	3.4053	1.8039	2.5602	4.6061	4.4872
/scratch/imbakker/gmv_gyri/output_freesurfer_5_3/1_013_PRG/stats/lh.aparc.pial_lgi.stats	3.1678	1.8992	3.2594	2.9209	2.3525	2.5237	3.0574	2.6487	2.6211	2.4638	2.3497	2.6852	1.9302	3.1379	2.4924	2.2531	4.3421	2.9646	3.4962	2.7105	3.4655	2.1136	3.4139	2.9394	1.9782	2.6187	2.1723	2.9586	4.0319	3.4748	1.9602	2.2998	4.6353	4.4346
/scratch/imbakker/gmv_gyri/output_freesurfer_5_3/1_015_PRG/stats/lh.aparc.pial_lgi.stats	3.293	1.7811	3.3055	2.9144	2.7312	2.6755	3.331	2.6499	2.7898	2.5174	2.4881	2.7244	1.9056	2.946	2.8473	2.3218	4.7144	2.9286	3.896	2.678	3.4927	2.1662	3.5175	2.91	1.8506	2.6977	2.1575	3.0515	4.253	3.6009	1.8723	2.4347	5.004	4.7758
/scratch/imbakker/gmv_gyri/output_freesurfer_5_3/1_016_PRG/stats/lh.aparc.pial_lgi.stats	3.472	1.6438	3.0211	2.5698	2.3886	2.5207	3.0462	2.7039	2.4285	2.3484	2.4618	2.5187	1.9659	3.385	2.5598	2.143	4.2581	2.6558	3.6296	2.484	3.3385	2.0261	3.1828	2.5871	1.8947	2.7082	2.0505	2.8477	4.1853	3.6098	1.8201	2.5896	4.5414	4.0059
/scratch/imbakker/gmv_gyri/output_freesurfer_5_3/1_017_PRG/stats/lh.aparc.pial_lgi.stats	3.7538	1.861	3.2037	3.0834	2.5109	2.5946	3.2595	2.605	2.6412	2.6061	2.6907	2.7679	2.1252	3.6839	2.7206	2.2565	4.8036	3.2135	4.0544	2.9552	3.5543	2.0205	3.5118	2.9118	2.0579	2.8249	2.1351	2.9538	4.6459	3.7095	2.0646	2.3775	5	5.0237
/scratch/imbakker/gmv_gyri/output_freesurfer_5_3/1_018_PRG/stats/lh.aparc.pial_lgi.stats	3.4481	1.7833	3.2883	2.725	2.4453	2.4924	3.0775	2.4306	2.5743	2.4223	2.6896	2.6695	2.0217	3.1942	2.6797	2.3841	4.3785	3.2023	4.0003	2.5764	3.6273	2.1482	3.6336	2.8102	1.9314	2.594	2.1004	2.978	4.119	3.566	2.0304	2.3579	4.7368	4.4786
/scratch/imbakker/gmv_gyri/output_freesurfer_5_3/1_023_PRG/stats/lh.aparc.pial_lgi.stats	3.3512	1.8008	2.9234	2.3545	2.1714	2.4796	3.0522	2.6165	2.3807	2.4995	2.3853	2.382	1.9569	3.1331	2.3276	2.2654	3.6304	2.5861	3.2808	2.2815	3.3124	2.0805	3.2168	2.5106	1.9167	2.4114	2.055	2.71	3.6801	3.3332	1.8632	2.3479	4.1127	3.835
/scratch/imbakker/gmv_gyri/output_freesurfer_5_3/1_024_PRG/stats/lh.aparc.pial_lgi.stats	3.8	2.0244	3.1061	2.9093	2.4462	2.6529	3.3293	2.6163	2.9245	2.6299	2.6377	2.9598	2.0578	3.608	2.7699	2.3909	4.4687	2.8035	3.7922	3.0139	3.6606	2.2825	3.5388	2.8901	2.1944	2.7994	2.233	2.9737	4.7004	3.872	1.8539	2.5082	5.2208	4.7578
/scratch/imbakker/gmv_gyri/output_freesurfer_5_3/1_026_PRG/stats/lh.aparc.pial_lgi.stats	3.9333	1.8371	3.1313	2.5609	2.3691	2.5593	3.1949	2.8041	2.4478	2.5591	2.4156	2.5709	2.0325	3.399	2.3755	2.1711	3.8043	2.7363	3.3082	2.5403	3.4624	2.0722	3.2988	2.6102	1.9884	2.6343	2.0636	2.7925	4.2123	3.6245	1.8701	2.4523	4.7064	4.1289
/scratch/imbakker/gmv_gyri/output_freesurfer_5_3/1_030_PRG/stats/lh.aparc.pial_lgi.stats	3.1075	1.678	2.8608	2.3608	2.4176	2.5303	2.776	2.5129	2.3564	2.3054	2.3408	2.4549	1.8425	2.8425	2.639	2.1343	3.8904	2.926	3.1555	2.3495	3.2601	1.9015	3.2161	2.4491	1.726	2.3887	1.9113	2.6733	3.6471	3.1649	1.6435	2.2385	4.2973	3.9198
/scratch/imbakker/gmv_gyri/output_freesurfer_5_3/1_039_PRG/stats/lh.aparc.pial_lgi.stats	3.8418	1.7606	3.29	2.7154	2.5955	2.5048	3.0516	2.6226	2.4814	2.2752	2.5451	2.4497	2.1141	3.4209	2.7413	2.1969	4.5167	2.8835	3.8836	2.4963	3.3878	2.0547	3.4736	2.6682	1.9191	2.6964	2.15	2.7095	4.4945	3.5556	1.9889	2.2595	5.3251	5.0079
/scratch/imbakker/gmv_gyri/output_freesurfer_5_3/1_040_PRG/stats/lh.aparc.pial_lgi.stats	3.363	1.7677	3.3814	2.6437	2.4056	2.6725	3.204	2.7552	2.6178	2.5431	2.6393	2.6224	2.0441	3.3237	2.6387	2.2459	4.6129	2.7178	4.0265	2.5644	3.5829	2.1326	3.5663	2.6649	1.9651	2.7675	2.2514	3.0254	4.397	3.606	1.9983	2.4883	5.0382	4.7969
/scratch/imbakker/gmv_gyri/output_freesurfer_5_3/1_041_PRG/stats/lh.aparc.pial_lgi.stats	3.3641	1.7533	3.4788	2.8216	2.3851	2.4565	3.187	2.7564	2.575	2.5584	2.7874	2.5471	2.0513	3.2841	2.3863	2.3099	4.4228	3.1404	3.7684	2.6577	3.6376	2.1165	3.584	2.8914	1.9135	2.7709	2.2153	3.0511	4.0249	3.5967	1.9099	2.473	4.5446	4.3908
/scratch/imbakker/gmv_gyri/output_freesurfer_5_3/1_042_PRG/stats/lh.aparc.pial_lgi.stats	3.3146	1.7241	2.98	2.6135	2.5446	2.5852	2.989	2.6933	2.3205	2.4598	2.4912	2.3852	1.8195	3.0297	2.7096	2.1772	3.9144	2.8505	3.4343	2.4574	3.3343	1.9602	3.3254	2.5321	1.7946	2.5822	2.0356	2.8138	3.9426	3.2084	1.8723	2.2345	4.5467	4.3357
/scratch/imbakker/gmv_gyri/output_freesurfer_5_3/1_043_PRG/stats/lh.aparc.pial_lgi.stats	3.5387	1.7706	3.2335	2.3812	2.4392	2.4572	3.1982	2.4404	2.3347	2.4	2.601	2.4046	2.0245	3.2283	2.5071	2.092	4.1559	3.0556	3.533	2.3217	3.4593	1.9788	3.4036	2.6148	1.9067	2.5946	2.0861	3.0151	4.0422	3.6199	1.9338	2.5	4.4667	4.1604
/scratch/imbakker/gmv_gyri/output_freesurfer_5_3/1_046_PRG/stats/lh.aparc.pial_lgi.stats	3.0264	1.634	2.9381	2.4235	2.2335	2.3181	2.8098	2.2225	2.3167	2.2874	2.2285	2.3658	1.7655	2.7927	2.4416	2.0672	3.9778	2.476	3.4722	2.3689	3.2165	1.9477	3.0383	2.4248	1.7132	2.4669	1.9639	2.5947	3.6766	3.4371	1.6975	2.0708	4.2655	3.9893
/scratch/imbakker/gmv_gyri/output_freesurfer_5_3/2_015_PRG/stats/lh.aparc.pial_lgi.stats	3.8002	1.9825	3.3364	3.0401	2.4936	2.782	3.3059	2.8727	2.4671	2.6487	2.4458	2.7322	1.9137	3.464	2.6789	2.5379	4.3392	2.6686	4.0192	2.8261	3.7961	2.4011	3.8626	2.9667	1.9255	2.7185	2.404	3.0885	4.503	3.9538	2.0198	2.2218	5.2506	4.6403
/scratch/imbakker/gmv_gyri/output_freesurfer_5_3/2_023_PRG/stats/lh.aparc.pial_lgi.stats	3.4639	1.811	3.3937	2.844	2.4225	2.4866	3.2628	2.6209	2.4693	2.3735	2.6045	2.7052	2.0196	3.3177	2.6827	2.1606	4.3844	2.9879	3.8957	2.7028	3.6242	2.0314	3.5584	2.7633	1.8913	2.8198	2.1548	2.8683	4.3064	3.8685	1.8675	2.4458	4.8264	4.4042
/scratch/imbakker/gmv_gyri/output_freesurfer_5_3/2_024_PRG/stats/lh.aparc.pial_lgi.stats	3.7307	1.9662	3.241	2.8022	3.0794	2.6775	3.2115	2.7612	2.5747	2.6084	3.66	2.7381	2.6739	3.5414	2.5954	2.3908	4.5822	3.2712	4.4292	2.6967	3.7557	2.1094	3.655	2.8623	2.2933	2.9465	2.3035	3.0985	4.6977	3.6466	2.5689	3.405	4.8846	4.8124
/scratch/imbakker/gmv_gyri/output_freesurfer_5_3/2_025_PRG/stats/lh.aparc.pial_lgi.stats	3.7069	1.8897	3.1936	2.9067	2.373	2.6378	3.4617	2.844	2.5699	2.6005	2.5491	2.5395	1.9429	3.4756	2.6556	2.3799	4.1434	2.9998	3.6253	2.585	3.5817	2.1214	3.4719	2.8476	1.9736	2.7927	2.2525	3.1399	4.241	3.7886	2.0593	2.3404	4.5842	4.3624
/scratch/imbakker/gmv_gyri/output_freesurfer_5_3/2_027_PRG/stats/lh.aparc.pial_lgi.stats	3.4978	1.6847	3.3664	2.8822	2.4058	2.5576	3.1546	2.6509	2.6158	2.4991	2.4457	2.6443	1.9504	3.1833	2.6051	2.3996	4.8012	3.0155	3.7666	2.6865	3.6058	2.1254	3.6872	2.897	1.853	2.9696	2.1711	3.0055	4.1356	3.5973	1.9227	2.2267	4.8571	4.6791
/scratch/imbakker/gmv_gyri/output_freesurfer_5_3/2_028_PRG/stats/lh.aparc.pial_lgi.stats	3.3672	1.7741	3.4803	2.4756	2.4996	2.6899	3.4957	2.6645	2.76	2.5573	2.4874	2.6072	1.8813	3.1553	2.8856	2.2659	4.1832	2.9999	3.7108	2.4401	3.5271	2.2673	3.5235	2.8114	1.8426	2.7722	2.1578	3.2687	4.019	3.7251	1.8586	2.2622	4.4349	4.2009
/scratch/imbakker/gmv_gyri/output_freesurfer_5_3/2_029_PRG/stats/lh.aparc.pial_lgi.stats	3.0215	1.7698	2.9977	2.6593	2.5266	2.5693	3.1169	2.588	2.5143	2.4538	2.5644	2.6857	2.021	3.1948	2.6621	2.21	3.7175	2.971	3.9047	2.5794	3.529	2.0569	3.4813	2.7991	1.9177	2.7342	2.0146	3.0708	4.0328	3.4818	2.0431	2.5313	4.4044	4.2722
/scratch/imbakker/gmv_gyri/output_freesurfer_5_3/2_030_PRG/stats/lh.aparc.pial_lgi.stats	3.6982	1.8341	3.2809	2.7571	2.6716	2.7101	2.961	2.7161	2.6654	2.4646	2.3843	2.7011	1.994	3.418	2.8431	2.1256	4.3965	2.3962	3.6442	2.659	3.6256	2.0581	3.5959	2.7409	1.9471	2.5479	2.0501	2.855	4.5964	3.5336	1.8491	2.4208	5.0151	4.9531
/scratch/imbakker/gmv_gyri/output_freesurfer_5_3/2_031_PRG/stats/lh.aparc.pial_lgi.stats	3.7425	2.0722	3.506	2.832	2.4891	2.6002	3.3458	2.7912	2.8538	2.4337	2.7397	2.9028	2.1465	3.6623	2.7115	2.3829	4.4908	2.9898	3.6767	2.8283	3.8745	2.2566	3.7358	2.8999	2.2253	2.9372	2.4027	2.9788	4.4873	4.0565	2.0044	2.7646	5.0511	4.6629
/scratch/imbakker/gmv_gyri/output_freesurfer_5_3/2_032_PRG/stats/lh.aparc.pial_lgi.stats	3.3916	1.9059	2.858	3.0189	2.4999	2.4945	2.965	2.5429	2.5407	2.407	2.4625	2.6004	1.9438	3.0959	2.7237	2.1891	4.0724	2.6917	3.2151	2.7041	3.3099	2.0949	3.2756	2.9563	2.0197	2.5369	1.9986	2.9235	3.7172	3.2869	1.8927	2.2877	4.2099	4.2095
/scratch/imbakker/gmv_gyri/output_freesurfer_5_3/2_033_PRG/stats/lh.aparc.pial_lgi.stats	2.8984	1.6117	2.8213	2.5298	2.2762	2.3226	2.7732	2.2064	2.3349	2.1952	2.2641	2.4615	1.8378	2.7199	2.4864	2.1056	3.8028	2.5706	3.358	2.3811	3.1596	1.9214	3.0593	2.5625	1.7893	2.4719	1.9154	2.7637	3.3643	3.1279	1.6817	2.2089	4.0455	3.8318
/scratch/imbakker/gmv_gyri/output_freesurfer_5_3/2_035_PRG/stats/lh.aparc.pial_lgi.stats	3.4911	2.0169	3.2862	3.0787	2.5564	2.5531	3.356	2.605	2.6222	2.5724	2.6504	2.6809	1.9807	3.136	2.6067	2.2949	4.1524	2.8728	3.906	2.937	3.7214	2.1401	3.5878	2.891	1.9897	2.6853	2.1578	3.1421	4.1633	3.6081	1.832	2.5875	4.8745	4.6208
/scratch/imbakker/gmv_gyri/output_freesurfer_5_3/2_036_PRG/stats/lh.aparc.pial_lgi.stats	3.5684	1.9888	3.4405	3.0613	2.5309	2.6074	3.2342	2.6595	3.1068	2.3896	2.6473	3.0695	2.0728	3.4081	2.66	2.3633	4.712	3.0483	4.0347	3.2118	3.7026	2.3424	3.6891	3.1413	2.1397	2.9165	2.2891	2.8786	4.1796	3.7436	1.9819	2.5328	4.7326	4.3188
/scratch/imbakker/gmv_gyri/output_freesurfer_5_3/2_050_PRG/stats/lh.aparc.pial_lgi.stats	3.3151	1.7157	3.4882	2.7813	2.4396	2.6013	3.234	2.6868	2.5559	2.6093	2.6739	2.4707	2.0646	3.3432	2.5427	2.3607	4.5115	3.0069	3.8343	2.469	3.7886	2.134	3.7343	2.8648	1.9573	2.9938	2.2582	3.1906	4.4586	3.8926	1.9749	2.4483	5.2619	4.6967
/scratch/imbakker/gmv_gyri/output_freesurfer_5_3/2_054_PRG/stats/lh.aparc.pial_lgi.stats	3.9616	2.0934	3.4896	2.6876	2.6136	2.6857	3.537	2.8265	2.6145	2.4916	2.5413	2.7289	2.0423	3.4356	2.8543	2.2856	4.6504	2.6776	3.5344	2.6617	3.8533	2.1506	3.8579	2.7771	2.0688	2.8725	2.2656	3.0692	4.6475	3.9101	1.9558	2.4973	5.4104	4.9778
/scratch/imbakker/gmv_gyri/output_freesurfer_5_3/2_055_PRG/stats/lh.aparc.pial_lgi.stats	3.5318	1.692	3.363	2.6895	2.5273	2.5955	3.1964	2.6005	2.5345	2.4458	2.4205	2.6946	1.9271	3.0866	2.7259	2.1483	4.166	3.0198	3.6571	2.6551	3.5728	2.0648	3.514	2.6539	1.8425	2.7454	2.1315	2.8991	4.0598	3.8191	1.8959	2.3665	4.8179	4.365
/scratch/imbakker/gmv_gyri/output_freesurfer_5_3/2_056_PRG/stats/lh.aparc.pial_lgi.stats	4.0981	1.8888	3.601	3.3255	2.6444	3.0214	3.5684	3.1824	2.8498	2.8868	2.5926	3.0811	2.0778	3.9828	3.0733	2.417	4.6131	2.7997	3.9125	3.1197	4.1639	2.2575	3.8238	3.1622	2.0789	2.9033	2.2928	3.2477	4.7987	4.125	2.0379	2.5064	5.5342	4.9537
/scratch/imbakker/gmv_gyri/output_freesurfer_5_3/3_001_PRG/stats/lh.aparc.pial_lgi.stats	3.2664	1.6071	3.063	2.4529	2.3035	2.5255	3.2253	2.5276	2.4327	2.6964	2.2203	2.4918	1.652	3.1471	2.5005	2.0627	4.0229	2.8133	3.3768	2.3842	3.4295	1.8062	3.3562	2.449	1.639	2.5123	2.0412	2.9316	4.0391	3.6078	1.7152	2.3392	4.5516	4.2468
/scratch/imbakker/gmv_gyri/output_freesurfer_5_3/3_003_PRG/stats/lh.aparc.pial_lgi.stats	3.0879	1.7364	2.9864	2.2541	2.4867	2.3917	2.858	2.4349	2.2446	2.1934	2.3499	2.3945	1.838	3.1278	2.5799	1.9307	3.5302	2.7908	3.281	2.3032	3.2914	1.7997	3.1347	2.2807	1.772	2.3188	1.9339	2.6412	3.8264	3.3006	1.7059	2.5283	4.3532	3.8912
/scratch/imbakker/gmv_gyri/output_freesurfer_5_3/3_004_PRG/stats/lh.aparc.pial_lgi.stats	3.3648	1.7846	2.7946	2.5466	2.4893	2.5885	2.9	2.7252	2.6262	2.4708	2.6496	2.624	1.8089	3.0628	2.6804	2.257	3.7613	2.961	3.1896	2.5147	3.401	2.1107	3.3407	2.6508	1.7315	2.2789	1.9832	2.7908	3.8495	3.3996	1.7243	2.5227	4.4303	4.1787
/scratch/imbakker/gmv_gyri/output_freesurfer_5_3/3_005_PRG/stats/lh.aparc.pial_lgi.stats	3.2775	1.7106	3.2997	2.4055	2.4142	2.5148	3.0687	2.5249	2.2115	2.5372	2.4026	2.3775	1.8959	2.9443	2.5915	2.0999	4.1065	2.835	3.4328	2.3562	3.5964	1.8847	3.4524	2.3894	1.8435	2.6591	2.1971	2.829	4.0511	3.5733	1.9469	2.1985	4.9191	4.3186
/scratch/imbakker/gmv_gyri/output_freesurfer_5_3/3_006_PRG/stats/lh.aparc.pial_lgi.stats	3.1702	1.6055	2.9831	2.4643	2.3363	2.4411	2.9876	2.441	2.4439	2.2501	2.2194	2.4929	1.782	2.7654	2.5719	2.2556	3.364	2.4915	2.8895	2.4582	3.3452	1.9558	3.189	2.5497	1.7381	2.4144	2.0159	2.7814	3.5221	3.3952	1.7863	2.3968	4.0262	3.5206
/scratch/imbakker/gmv_gyri/output_freesurfer_5_3/3_009_PRG/stats/lh.aparc.pial_lgi.stats	3.2433	1.5906	2.972	2.3062	2.3996	2.3761	2.8995	2.5475	2.225	2.1586	2.5518	2.163	1.8654	3.1324	2.4924	2.173	4.0327	2.9132	3.8015	2.1898	3.3724	1.8416	3.2514	2.4174	1.7152	2.5204	1.9387	2.7401	3.8525	3.3984	1.6732	2.321	4.3383	4.1388
/scratch/imbakker/gmv_gyri/output_freesurfer_5_3/3_011_PRG/stats/lh.aparc.pial_lgi.stats	3.3634	1.7786	2.6928	2.7215	2.3562	2.4433	3.0686	2.2899	2.5651	2.3843	2.5022	2.6234	1.8995	3.3238	2.6508	2.2787	3.4991	2.9694	3.248	2.6751	3.4963	2.1194	3.2887	2.6962	1.8248	2.3963	2.0483	2.8344	4.0222	3.492	1.8416	2.3512	4.4439	4.1414
/scratch/imbakker/gmv_gyri/output_freesurfer_5_3/3_012_PRG/stats/lh.aparc.pial_lgi.stats	3.7009	1.8674	3.523	2.7362	2.7181	2.822	3.3557	2.7323	2.4822	2.5444	2.4378	2.5696	1.9266	3.5145	2.9419	2.2924	4.3082	2.8506	3.4571	2.6249	3.8646	2.1205	3.8302	2.5278	1.8763	2.8779	2.3069	2.9963	4.2296	4.0695	1.8427	2.508	4.923	4.5541
/scratch/imbakker/gmv_gyri/output_freesurfer_5_3/3_013_PRG/stats/lh.aparc.pial_lgi.stats	3.1799	1.7065	2.9917	2.3977	2.3996	2.5033	3.0738	2.4956	2.4912	2.3768	2.3093	2.5246	1.8571	2.9412	2.6109	2.2262	4.0513	2.7508	3.4253	2.3701	3.4068	1.9936	3.3376	2.5692	1.7125	2.427	1.9762	2.7869	3.9334	3.386	1.645	2.355	4.6435	4.3313
/scratch/imbakker/gmv_gyri/output_freesurfer_5_3/3_015_PRG/stats/lh.aparc.pial_lgi.stats	3.137	1.7088	2.8569	2.244	2.4803	2.3834	2.8861	2.3443	2.1813	2.3586	2.3711	2.3235	1.9354	2.8189	2.4468	1.9726	3.7529	2.7432	3.2509	2.2718	3.1533	1.868	2.9922	2.2638	1.7989	2.4483	1.9662	2.6053	3.6097	3.3498	1.7358	2.3813	4.1698	3.8935
/scratch/imbakker/gmv_gyri/output_freesurfer_5_3/4_001_PRG/stats/lh.aparc.pial_lgi.stats	3.5007	1.6267	3.2531	2.4956	2.3406	2.4771	3.2971	2.6317	2.2785	2.4759	2.3629	2.3678	1.8193	3.1723	2.6058	2.0035	3.7463	2.8236	3.281	2.3661	3.4448	1.8315	3.302	2.394	1.7002	2.4885	2.0194	2.8541	4.0835	3.6229	1.7582	2.353	4.8504	4.2269
/scratch/imbakker/gmv_gyri/output_freesurfer_5_3/4_002_PRG/stats/lh.aparc.pial_lgi.stats	3.7985	1.8004	3.1224	2.793	2.553	2.4638	3.0003	2.463	2.724	2.2728	2.555	2.5956	2.0049	3.6313	2.7495	2.1493	4.076	2.4453	3.5766	2.5869	3.5926	2.0619	3.4684	2.7586	1.9668	2.5776	2.0509	2.7051	4.414	3.7523	1.9351	2.6138	4.9166	4.442
/scratch/imbakker/gmv_gyri/output_freesurfer_5_3/4_003_PRG/stats/lh.aparc.pial_lgi.stats	3.3452	1.7747	3.1225	2.2557	2.3689	2.5106	2.9761	2.5372	2.2675	2.5029	2.5897	2.3207	2.0061	3.0843	2.5987	2.0381	3.9074	2.7988	3.3065	2.0901	3.423	1.8545	3.2975	2.3085	1.8502	2.4917	2.0684	2.6405	4.1039	3.4556	1.819	2.4288	4.6121	4.1924
/scratch/imbakker/gmv_gyri/output_freesurfer_5_3/4_004_PRG/stats/lh.aparc.pial_lgi.stats	3.5557	1.7784	2.9603	2.5776	2.6089	2.6427	3.2242	2.5877	2.3102	2.5683	2.6156	2.5764	2.0698	3.2908	2.7537	2.2962	4.2212	2.6996	3.2216	2.546	3.6277	2.0044	3.3424	2.6555	1.9649	2.6703	2.039	3.0902	4.3198	3.7553	1.9779	2.3158	4.9294	4.5741
/scratch/imbakker/gmv_gyri/output_freesurfer_5_3/4_005_PRG/stats/lh.aparc.pial_lgi.stats	3.2592	1.7289	2.7078	2.5018	2.5267	2.4329	2.9225	2.3455	2.3487	2.3564	2.3113	2.464	1.8638	2.8418	2.6713	2.1222	3.7289	2.4682	3.3243	2.439	3.1379	1.9344	3.0611	2.5001	1.7588	2.1568	1.9264	2.7292	3.9455	3.3864	1.7062	2.2123	4.4064	4.1895
/scratch/imbakker/gmv_gyri/output_freesurfer_5_3/4_011_PRG/stats/lh.aparc.pial_lgi.stats	3.582	1.8571	3.2848	2.25	2.4224	2.461	3.1985	2.54	2.1536	2.5877	2.4608	2.3246	1.8149	3.3364	2.5392	2.1149	4.4291	2.466	3.7408	2.1948	3.7002	1.9647	3.5253	2.3475	1.8329	2.6944	2.1312	2.9239	4.1194	3.6926	1.7825	2.3553	4.7211	4.0023

## Sheet: lGI_stats_RH
X1	X2	X3	X4	X5	X6	X7	X8	X9	X10	X11	X12	X13	X14	X15	X16	X17	X18	X19	X20	X21	X22	X23	X24	X25	X26	X27	X28	X29	X30	X31	X32	X33	X34	X35
	bankssts	caudalanteriorcingulate	caudalmiddlefrontal	cuneus	entorhinal	fusiform	inferiorparietal	inferiortemporal	isthmuscingulate	lateraloccipital	lateralorbitofrontal	lingual	medialorbitofrontal	middletemporal	parahippocampal	paracentral	parsopercularis	parsorbitalis	parstriangularis	pericalcarine	postcentral	posteriorcingulate	precentral	precuneus	rostralanteriorcingulate	rostralmiddlefrontal	superiorfrontal	superiorparietal	superiortemporal	supramarginal	frontalpole	temporalpole	transversetemporal	insula
/scratch/imbakker/gmv_gyri/output_freesurfer_5_3/1_006_PRG/stats/rh.aparc.pial_lgi.stats	3.6062	1.917	3.1771	3.1683	2.4516	2.4729	3.2565	2.6165	3.0532	2.5852	2.3115	2.7045	1.9334	3.3479	2.5563	2.4655	4.0619	2.7149	3.5438	2.8354	3.4284	2.3549	3.3483	3.139	2.0138	2.7096	2.1422	2.901	4.0764	3.469	1.8435	2.1347	4.6895	4.1533
/scratch/imbakker/gmv_gyri/output_freesurfer_5_3/1_007_PRG/stats/rh.aparc.pial_lgi.stats	3.567	2.0466	2.9107	2.7772	2.5353	2.7085	3.2022	2.6604	2.7328	2.4279	2.5013	2.9493	2.0333	3.2664	2.8864	2.2701	3.949	2.9939	3.647	2.8038	3.4419	2.203	3.3264	2.8325	2.1093	2.587	2.1772	2.7987	3.934	3.5655	2.0301	2.4584	4.3062	4.3341
/scratch/imbakker/gmv_gyri/output_freesurfer_5_3/1_009_PRG/stats/rh.aparc.pial_lgi.stats	3.5971	1.8307	3.2295	2.8745	2.5276	2.6779	3.2806	2.7657	2.8105	2.6214	2.4782	2.7498	1.9181	3.4394	2.7297	2.3588	4.6006	2.7697	3.9356	2.7432	3.4919	2.1314	3.4497	2.9353	1.8901	2.8023	2.2255	3.1061	4.2078	3.5544	1.841	2.2938	4.6734	4.4003
/scratch/imbakker/gmv_gyri/output_freesurfer_5_3/1_010_PRG/stats/rh.aparc.pial_lgi.stats	3.8084	1.9105	3.435	3.017	2.397	2.5505	3.4307	2.514	2.8845	2.6069	2.4805	2.8145	1.9935	3.2573	2.6669	2.2512	4.9713	3.0931	4.2282	2.7975	3.8396	2.1105	3.859	2.8734	2.0609	2.8092	2.2128	3.0317	4.5108	3.9203	1.9631	2.1521	5.4738	4.9464
/scratch/imbakker/gmv_gyri/output_freesurfer_5_3/1_011_PRG/stats/rh.aparc.pial_lgi.stats	3.7858	1.8524	3.0821	2.9158	2.4334	2.591	3.2266	2.6653	2.535	2.5376	2.4827	2.6389	1.9747	3.4647	2.6038	2.3183	4.061	2.9477	3.9589	2.7525	3.5997	2.1153	3.488	2.8526	1.9668	2.5074	2.0681	2.9488	4.3197	3.8012	1.8863	2.3036	4.9571	4.285
/scratch/imbakker/gmv_gyri/output_freesurfer_5_3/1_012_PRG/stats/rh.aparc.pial_lgi.stats	3.4253	1.8601	3.1904	3.2758	2.4802	2.5539	2.938	2.5174	2.8538	2.388	2.6279	2.9688	2.0073	3.3064	2.7012	2.4255	4.1794	3.3609	3.6456	3.0121	3.6238	2.2373	3.462	3.3087	2.0308	2.5925	2.185	2.9226	4.4261	3.4823	1.9396	2.4939	4.9842	4.3093
/scratch/imbakker/gmv_gyri/output_freesurfer_5_3/1_013_PRG/stats/rh.aparc.pial_lgi.stats	3.1905	1.8623	3.0462	3.3016	2.5756	2.6284	2.9402	2.5625	3.0255	2.5597	2.5717	3.1183	2.0222	3.0126	2.7878	2.18	4.5318	2.9104	3.8932	3.235	3.669	2.1007	3.5951	3.2367	1.9806	2.6561	2.1739	2.8931	4.4269	3.5786	1.9784	2.5077	4.8974	4.4768
/scratch/imbakker/gmv_gyri/output_freesurfer_5_3/1_014_PRG/stats/rh.aparc.pial_lgi.stats	3.6888	1.9318	3.5197	3.0092	2.5587	2.6718	3.4708	2.7072	2.809	2.6789	2.8149	2.8047	2.071	3.3507	2.8183	2.4068	4.5682	3.6398	3.8506	2.8268	3.8481	2.2543	3.8374	2.9938	2.0138	2.6327	2.2441	3.006	4.3719	3.7672	2.0945	2.2509	5.3606	4.632
/scratch/imbakker/gmv_gyri/output_freesurfer_5_3/1_015_PRG/stats/rh.aparc.pial_lgi.stats	3.1767	1.8389	3.2392	2.8206	2.4876	2.4911	3.2035	2.4382	2.6533	2.4121	2.2646	2.614	1.835	3.1612	2.6888	2.3064	4.5252	2.6331	3.5751	2.5886	3.5687	2.1303	3.4596	2.9174	1.8901	2.656	2.1568	3.0784	4.1978	3.6181	1.8646	2.1259	4.9288	4.365
/scratch/imbakker/gmv_gyri/output_freesurfer_5_3/1_016_PRG/stats/rh.aparc.pial_lgi.stats	3.5387	1.8384	3.0081	2.8215	2.5092	2.5017	3.1477	2.6787	2.5445	2.4144	2.3759	2.6053	1.9639	3.4701	2.6254	2.1631	4.1501	2.8376	3.4326	2.6644	3.4241	2.0903	3.2437	2.7574	1.9982	2.6339	2.1395	2.8779	4.3552	3.6024	1.867	2.3619	4.988	4.3212
/scratch/imbakker/gmv_gyri/output_freesurfer_5_3/1_017_PRG/stats/rh.aparc.pial_lgi.stats	3.5443	1.7636	3.3806	2.8828	2.6889	2.625	3.0962	2.5859	2.9499	2.3326	2.6375	2.9104	2.1193	3.3874	2.9189	2.2498	4.4476	2.9163	3.931	2.8529	3.6626	2.1036	3.6572	3.0118	2.0154	2.6779	2.1497	2.8473	4.4807	3.5456	2.0734	2.4626	5.0672	4.3724
/scratch/imbakker/gmv_gyri/output_freesurfer_5_3/1_018_PRG/stats/rh.aparc.pial_lgi.stats	3.5216	1.8297	3.1818	3.0629	2.4986	2.575	3.2146	2.4663	2.9135	2.559	2.7195	2.7718	2.0469	3.0917	2.8061	2.2884	4.2947	3.2219	4.059	2.8425	3.5579	2.2493	3.527	2.9922	1.9609	2.7457	2.1709	2.9405	3.8854	3.5905	2.0698	2.2172	4.3728	4.0936
/scratch/imbakker/gmv_gyri/output_freesurfer_5_3/1_023_PRG/stats/rh.aparc.pial_lgi.stats	3.5937	1.8899	2.966	2.6263	2.3312	2.4274	3.0959	2.5459	2.4994	2.4808	2.3408	2.5816	1.9411	3.3118	2.5546	2.2862	3.8965	2.8366	3.3917	2.5549	3.4976	2.1068	3.354	2.6396	1.9691	2.5134	2.1336	2.7111	4.0414	3.5976	1.854	2.2414	4.5573	3.8226
/scratch/imbakker/gmv_gyri/output_freesurfer_5_3/1_024_PRG/stats/rh.aparc.pial_lgi.stats	3.9085	2.0275	3.2939	3.3259	2.5113	2.6555	3.3889	2.7743	2.9855	2.6192	2.5195	2.7971	2.1405	3.5591	2.9434	2.4679	4.3702	2.9873	3.6403	3.014	3.9697	2.2824	3.7652	3.2846	2.1702	2.7638	2.2924	2.9609	4.68	3.9896	2.0349	2.422	5.3654	4.4289
/scratch/imbakker/gmv_gyri/output_freesurfer_5_3/1_026_PRG/stats/rh.aparc.pial_lgi.stats	3.4943	1.9321	3.3206	2.8278	2.4073	2.469	3.1671	2.5365	2.438	2.4477	2.4001	2.6589	1.9903	3.1538	2.5595	2.1804	3.8755	2.7621	3.5332	2.7028	3.4884	1.9799	3.4663	2.6861	2.0124	2.6372	2.2188	2.8415	3.9362	3.6333	1.9292	2.327	4.5231	3.942
/scratch/imbakker/gmv_gyri/output_freesurfer_5_3/1_030_PRG/stats/rh.aparc.pial_lgi.stats	3.2618	1.7278	3.0049	2.6724	2.2828	2.4801	2.9074	2.4052	2.5508	2.359	2.3484	2.616	1.8431	2.7628	2.6201	2.1361	3.6565	2.9404	3.4649	2.517	3.2646	1.9201	3.2421	2.6663	1.7944	2.2946	2.0484	2.711	3.4779	3.1835	1.7229	2.1275	4.2599	3.9011
/scratch/imbakker/gmv_gyri/output_freesurfer_5_3/1_039_PRG/stats/rh.aparc.pial_lgi.stats	3.438	1.7817	2.9274	2.824	2.4256	2.3705	2.9966	2.2653	2.4842	2.2556	2.4908	2.5598	2.0164	3.0935	2.6091	2.1917	4.3999	2.8478	3.7016	2.6879	3.3525	2.066	3.2376	2.7521	1.9467	2.6223	2.1171	2.801	4.2774	3.521	1.9588	2.2651	5.0879	4.5752
/scratch/imbakker/gmv_gyri/output_freesurfer_5_3/1_040_PRG/stats/rh.aparc.pial_lgi.stats	3.2255	1.8187	3.4643	2.7588	2.5297	2.6055	3.3122	2.5825	2.6081	2.5384	2.4172	2.6187	1.9856	3.1767	2.5797	2.252	4.1294	2.6465	3.9188	2.5694	3.5334	2.0451	3.4498	2.8731	1.9913	2.7217	2.2405	3.0092	4.1913	3.7122	1.9439	2.4239	4.6759	4.5128
/scratch/imbakker/gmv_gyri/output_freesurfer_5_3/1_041_PRG/stats/rh.aparc.pial_lgi.stats	3.7281	1.8639	3.4073	2.9212	2.3474	2.4742	3.3028	2.6275	2.8492	2.6609	2.5692	2.8229	2.0644	3.4317	2.5081	2.216	4.109	3.0523	3.8122	2.8926	3.5151	2.0778	3.4323	2.9853	2.0667	2.8068	2.2321	2.9565	4.2066	3.6778	2.0657	2.3267	4.8598	4.1407
/scratch/imbakker/gmv_gyri/output_freesurfer_5_3/1_042_PRG/stats/rh.aparc.pial_lgi.stats	3.5875	1.8207	2.9882	2.6453	2.4429	2.4568	3.2351	2.6171	2.41	2.5241	2.2824	2.4688	1.9005	3.187	2.5944	2.1993	3.8229	2.8508	3.0845	2.5717	3.4434	2.0501	3.3217	2.6176	1.8722	2.5013	2.0696	2.9281	3.9268	3.5529	1.9086	2.1753	4.4379	4.1294
/scratch/imbakker/gmv_gyri/output_freesurfer_5_3/1_043_PRG/stats/rh.aparc.pial_lgi.stats	3.3688	1.7946	3.2252	2.8817	2.4496	2.4994	3.1009	2.4205	2.6625	2.5052	2.4568	2.7362	2.019	3.1102	2.6043	2.2289	4.0852	2.9833	3.8176	2.7286	3.4687	2.1238	3.4848	2.7529	1.9313	2.5768	2.1302	2.9353	3.9714	3.5375	1.8672	2.4395	4.494	4.1717
/scratch/imbakker/gmv_gyri/output_freesurfer_5_3/1_046_PRG/stats/rh.aparc.pial_lgi.stats	3.2181	1.7695	3.015	2.4893	2.2561	2.3758	2.8652	2.4255	2.2315	2.4584	2.2952	2.3392	1.841	2.9261	2.4326	2.0151	3.8454	2.8559	3.6864	2.4214	3.1203	1.9118	3.0784	2.4052	1.8358	2.4767	2.0514	2.5364	3.6551	3.2494	1.8474	2.0659	4.1757	3.7987
/scratch/imbakker/gmv_gyri/output_freesurfer_5_3/2_004_PRG/stats/rh.aparc.pial_lgi.stats	3.9082	2.3207	3.7337	3.4158	2.7462	2.9382	3.5328	2.7884	3.278	2.7972	2.9819	3.358	2.1877	3.5419	3.1336	2.6685	5.0215	3.8727	4.9614	3.3882	3.9523	2.6056	3.9095	3.3776	2.222	3.1707	2.5375	3.2	4.7929	3.9935	2.2516	2.2699	5.7677	5.2259
/scratch/imbakker/gmv_gyri/output_freesurfer_5_3/2_006_PRG/stats/rh.aparc.pial_lgi.stats	3.9807	2.1729	3.6034	3.2898	2.6199	2.8672	3.5974	3.0142	2.8984	2.9165	2.7819	2.9969	2.2787	3.6505	2.7804	2.3675	4.8902	3.4528	4.192	3.2044	3.8292	2.3177	3.8609	3.1701	2.2764	3.2338	2.4888	3.102	4.6036	4.0762	2.4449	2.5741	5.3876	4.5115
/scratch/imbakker/gmv_gyri/output_freesurfer_5_3/2_007_PRG/stats/rh.aparc.pial_lgi.stats	3.7864	2.1731	3.5608	3.4573	2.5917	2.931	3.4711	3.0546	3.1892	2.921	2.7703	3.1949	2.2321	3.6002	3.032	2.767	4.8101	3.0817	3.8431	3.196	4.032	2.6978	3.8759	3.4541	2.2511	2.9421	2.4693	3.3065	4.6373	3.8459	2.213	2.6021	5.4223	4.5738
/scratch/imbakker/gmv_gyri/output_freesurfer_5_3/2_008_PRG/stats/rh.aparc.pial_lgi.stats	3.5129	2.1168	3.7157	3.7355	2.8523	2.8622	3.4712	2.8455	3.3899	2.6397	2.7517	3.2365	2.2521	3.382	3.1375	2.6529	5.2043	3.3753	4.3567	3.6099	4.0429	2.5318	3.9251	3.6185	2.1772	3.2169	2.6598	3.4924	4.7648	3.9471	2.3315	2.4756	6.0878	5.373
/scratch/imbakker/gmv_gyri/output_freesurfer_5_3/2_009_PRG/stats/rh.aparc.pial_lgi.stats	3.9923	2.3778	3.663	3.5794	2.5463	2.9275	3.6098	2.9726	3.1519	2.8704	3.1669	3.2411	2.2814	3.7491	2.9697	2.8268	5.7279	3.9499	5.1408	3.3367	4.1884	2.6413	4.235	3.5466	2.3139	3.2414	2.6869	3.5932	4.9763	4.1007	2.3972	2.3696	6.1315	5.1633
/scratch/imbakker/gmv_gyri/output_freesurfer_5_3/2_011_PRG/stats/rh.aparc.pial_lgi.stats	4.5449	2.1658	3.9392	3.5563	2.9551	3.2388	3.961	3.173	3.3785	3.0878	2.9957	3.4007	2.1618	3.9283	3.4752	2.7497	5.2417	3.3183	4.3653	3.4013	4.3428	2.6057	4.2012	3.6099	2.1794	3.2254	2.6781	3.4142	5.2114	4.3179	2.1764	2.4415	6.2126	5.1543
/scratch/imbakker/gmv_gyri/output_freesurfer_5_3/2_021_PRG/stats/rh.aparc.pial_lgi.stats	4.1954	2.3948	4.1083	3.6749	2.7659	2.875	3.8125	2.8692	3.439	2.8419	3.2445	3.2953	2.4438	3.8163	2.8454	2.9539	5.2913	3.8273	4.8415	3.4454	4.3157	2.777	4.2807	3.5978	2.4571	3.4279	2.8514	3.5967	5.092	4.4283	2.6005	2.723	5.8278	5.5847
/scratch/imbakker/gmv_gyri/output_freesurfer_5_3/2_027_PRG/stats/rh.aparc.pial_lgi.stats	3.5255	1.8767	3.5119	3.0253	2.523	2.4939	3.3652	2.5316	2.7586	2.578	2.5168	2.7228	2.0512	3.2222	2.6357	2.4279	4.5002	2.935	3.6754	2.8371	3.8047	2.1162	3.6471	3.0341	1.9923	2.8703	2.2412	3.0905	4.1838	3.7561	2.0247	2.359	5.0539	4.3316
/scratch/imbakker/gmv_gyri/output_freesurfer_5_3/2_029_PRG/stats/rh.aparc.pial_lgi.stats	3.7397	1.87	3.0643	3.0193	2.3223	2.3666	3.1812	2.3192	2.7349	2.4815	2.5186	2.7603	1.9313	3.1184	2.4692	2.217	4.3409	3.287	3.7875	2.902	3.537	2.0237	3.5387	2.9104	1.9364	2.7786	2.1198	2.9047	4.1136	3.7546	1.8992	2.3074	4.9566	4.0165
/scratch/imbakker/gmv_gyri/output_freesurfer_5_3/2_030_PRG/stats/rh.aparc.pial_lgi.stats	3.6369	1.8014	3.1586	2.9627	2.5801	2.6449	3.1487	2.4298	2.8362	2.6337	2.4019	2.7602	1.9254	3.2107	2.8432	2.2158	4.4868	2.4456	3.9487	2.69	3.6089	2.0552	3.5908	2.8521	1.8872	2.4333	2.1466	2.8954	4.2495	3.7064	1.9426	2.2648	5.0265	4.6639
/scratch/imbakker/gmv_gyri/output_freesurfer_5_3/2_031_PRG/stats/rh.aparc.pial_lgi.stats	3.9027	2.1676	3.4439	3.2316	2.5105	2.6624	3.395	2.6157	3.1957	2.5307	2.6376	3.1312	2.1943	3.4841	2.9682	2.4172	4.8513	2.856	3.6566	3.2318	3.8502	2.2934	3.8436	3.0933	2.2787	2.8326	2.4639	3.0407	4.3994	3.8032	2.0815	2.3991	5.2805	4.8698
/scratch/imbakker/gmv_gyri/output_freesurfer_5_3/2_032_PRG/stats/rh.aparc.pial_lgi.stats	3.6169	1.9295	2.9994	2.9183	2.3463	2.3956	3.0209	2.446	2.5873	2.5087	2.3773	2.7029	2.0501	3.0445	2.6431	2.2284	4.0922	2.5763	3.6401	2.8149	3.3285	2.1739	3.3602	2.8903	2.087	2.5211	2.1531	2.8758	3.6725	3.3158	1.9499	2.229	4.2636	4.0699
/scratch/imbakker/gmv_gyri/output_freesurfer_5_3/2_034_PRG/stats/rh.aparc.pial_lgi.stats	3.1663	1.8398	2.914	2.7738	2.4479	2.4935	3.09	2.4952	2.5771	2.3888	2.3963	2.7405	1.8927	2.8906	2.5531	2.1081	3.8628	2.9371	3.4447	2.7842	3.2504	2.1164	3.2244	2.7015	1.919	2.4142	2.0547	2.713	3.7375	3.3751	1.8584	2.3919	4.4538	3.8834
/scratch/imbakker/gmv_gyri/output_freesurfer_5_3/2_035_PRG/stats/rh.aparc.pial_lgi.stats	4.0982	2.0433	3.2472	2.9505	2.3854	2.4413	3.2454	2.5052	2.847	2.4468	2.5124	2.8599	2.0615	3.3851	2.6424	2.4125	4.4047	3.0809	3.9045	2.8601	3.6118	2.2162	3.5656	3.001	2.1013	2.7434	2.2074	2.9531	4.5115	3.6084	1.9194	2.3338	4.9833	4.3677
/scratch/imbakker/gmv_gyri/output_freesurfer_5_3/2_037_PRG/stats/rh.aparc.pial_lgi.stats	3.8152	2.0876	3.4018	2.9457	2.5597	2.743	3.5203	2.8188	2.6353	2.6198	2.5134	2.7367	2.048	3.3179	2.7948	2.2708	4.4503	2.741	3.6917	2.8449	3.5828	2.1167	3.7065	3.0148	2.1836	2.9341	2.3475	3.1059	4.2179	3.7191	2.2042	2.4273	4.7952	4.3029
/scratch/imbakker/gmv_gyri/output_freesurfer_5_3/2_038_PRG/stats/rh.aparc.pial_lgi.stats	3.9455	2.1577	3.522	2.6162	2.8022	2.9887	3.6429	2.9	3.1195	2.8256	2.5533	2.89	2.3149	3.4299	3.0129	2.6264	4.3465	3.0089	3.8621	2.7468	3.8038	2.6286	3.7247	3.1163	2.2998	3.1717	2.5106	3.1276	4.2592	3.8633	2.3331	2.5347	4.9607	4.4385
/scratch/imbakker/gmv_gyri/output_freesurfer_5_3/2_040_PRG/stats/rh.aparc.pial_lgi.stats	4.0226	2.0791	3.4354	3.7502	2.9149	3.0742	3.7538	3.0593	3.2483	2.8843	2.7322	3.2125	2.213	3.3305	3.0966	2.6286	4.9655	3.1019	4.7032	3.3651	3.7678	2.4795	3.7088	3.462	2.2409	3.1494	2.4558	3.4174	4.42	3.9864	2.2981	2.6515	5.2656	4.8471
/scratch/imbakker/gmv_gyri/output_freesurfer_5_3/2_042_PRG/stats/rh.aparc.pial_lgi.stats	4.0845	2.0356	3.6263	3.2363	2.6543	2.8367	3.5965	2.9588	2.8415	2.777	2.7486	2.8692	2.1835	3.675	2.9176	2.4403	4.7024	3.1944	3.8597	3.0074	3.8693	2.4089	3.8504	3.1613	2.1128	2.9637	2.406	3.2328	4.6833	4.0822	2.1487	2.6455	5.3015	4.7899
/scratch/imbakker/gmv_gyri/output_freesurfer_5_3/2_043_PRG/stats/rh.aparc.pial_lgi.stats	3.7582	2.2053	3.2268	3.0186	2.569	2.6894	3.261	2.7508	2.9469	2.5367	2.5791	2.9607	2.2678	3.5475	2.9008	2.4887	4.573	2.9072	4.1367	2.8966	3.8481	2.344	3.7936	2.9707	2.2718	2.936	2.3724	3.1144	4.4142	3.7814	2.1204	2.5565	5.0455	4.6605
/scratch/imbakker/gmv_gyri/output_freesurfer_5_3/2_045_PRG/stats/rh.aparc.pial_lgi.stats	4.0213	2.1099	3.689	3.0089	2.6745	2.8458	3.5582	2.9601	3.0094	2.6922	2.7272	2.9598	2.2535	3.7151	2.8347	2.5564	4.6776	3.3698	4.0465	2.9732	4.2445	2.4448	4.0175	3.0758	2.2439	3.254	2.5074	3.1506	4.5761	4.1649	2.258	2.8029	5.3097	4.6514
/scratch/imbakker/gmv_gyri/output_freesurfer_5_3/2_050_PRG/stats/rh.aparc.pial_lgi.stats	3.5701	1.7856	3.2567	2.9789	2.6874	2.6256	3.4123	2.5737	2.632	2.7386	2.6134	2.6404	2.058	3.1608	2.7556	2.2793	4.6105	2.9779	4.316	2.7851	3.7244	2.0757	3.798	2.9822	1.962	2.8253	2.1809	3.1567	4.2076	3.7525	1.9517	2.3819	5.3075	4.6826
/scratch/imbakker/gmv_gyri/output_freesurfer_5_3/2_055_PRG/stats/rh.aparc.pial_lgi.stats	3.5976	1.8038	3.2171	2.8762	2.6839	2.6619	3.211	2.7365	2.5847	2.4998	2.4844	2.5715	1.9877	3.2101	2.7658	2.2314	4.0074	2.8296	3.4284	2.684	3.4064	2.1406	3.4296	2.8475	1.9453	2.6335	2.1743	2.9228	4.0694	3.6769	1.8252	2.5044	4.6442	4.1336
/scratch/imbakker/gmv_gyri/output_freesurfer_5_3/3_001_PRG/stats/rh.aparc.pial_lgi.stats	3.3282	1.7799	3.2598	2.6594	2.5784	2.5417	3.2261	2.4293	2.4811	2.5872	2.1632	2.6921	1.881	3.1641	2.7889	2.0126	4.0339	2.5274	3.182	2.6477	3.4661	1.8744	3.4824	2.5177	1.8575	2.4695	2.1257	2.71	3.983	3.8195	1.8188	2.3652	4.7068	4.1118
/scratch/imbakker/gmv_gyri/output_freesurfer_5_3/3_004_PRG/stats/rh.aparc.pial_lgi.stats	3.301	1.7341	2.944	2.7721	2.4322	2.4554	3.0848	2.4335	2.7788	2.3633	2.4467	2.6153	1.8134	3.1131	2.6893	2.2188	4.0782	3.2203	3.6451	2.6281	3.4073	2.085	3.3157	2.7891	1.8065	2.4539	1.9936	2.8158	4.0313	3.5403	1.7811	2.1559	4.2789	4.0394
/scratch/imbakker/gmv_gyri/output_freesurfer_5_3/3_005_PRG/stats/rh.aparc.pial_lgi.stats	3.3822	1.7053	3.1335	2.5748	2.3956	2.4677	3.1447	2.5835	2.3014	2.4597	2.3093	2.4359	1.9462	3.1922	2.4936	2.2206	4.2382	2.7647	3.809	2.4359	3.5685	1.9294	3.4431	2.582	1.9025	2.6847	2.1747	2.8403	4.1069	3.683	1.9324	2.2175	4.6808	4.455
/scratch/imbakker/gmv_gyri/output_freesurfer_5_3/3_006_PRG/stats/rh.aparc.pial_lgi.stats	3.3723	1.7793	2.8981	2.4924	2.5247	2.5673	2.9442	2.3234	2.3979	2.5495	2.2388	2.6065	1.9105	2.9578	2.7039	2.0678	3.8243	2.6644	3.4939	2.5099	3.1844	1.917	3.0689	2.4505	1.8966	2.3392	2.0822	2.5994	3.7558	3.3119	1.8166	2.3637	4.3988	4.0283
/scratch/imbakker/gmv_gyri/output_freesurfer_5_3/3_007_PRG/stats/rh.aparc.pial_lgi.stats	2.8978	1.649	2.7053	2.551	2.5477	2.4313	2.6933	2.2521	2.228	2.1863	2.338	2.3728	1.9026	2.8693	2.6877	2.0569	3.7987	2.5483	2.9973	2.3893	3.171	1.8546	3.1123	2.41	1.8189	2.2924	1.9402	2.4439	3.7834	3.1971	1.8318	2.266	4.2652	3.8881
/scratch/imbakker/gmv_gyri/output_freesurfer_5_3/3_009_PRG/stats/rh.aparc.pial_lgi.stats	3.2946	1.6835	2.9062	2.553	2.3652	2.3629	2.837	2.4082	2.2009	2.277	2.3045	2.3007	1.7867	2.9048	2.4881	2.0895	3.67	3.0047	3.3206	2.3569	3.2932	1.7794	3.1949	2.4613	1.7108	2.3977	2.06	2.6942	3.7219	3.3808	1.7166	2.2258	4.2443	3.6779
/scratch/imbakker/gmv_gyri/output_freesurfer_5_3/3_011_PRG/stats/rh.aparc.pial_lgi.stats	3.4147	1.7619	2.8608	2.6431	2.3263	2.4491	3.2207	2.3841	2.4701	2.3657	2.3717	2.6057	1.87	3.5187	2.5773	2.2931	3.9553	2.6643	3.2352	2.7215	3.6154	2.1227	3.4554	2.7177	1.812	2.4681	2.0999	2.8514	4.3678	3.5012	1.8145	2.2104	5.0129	4.2528
/scratch/imbakker/gmv_gyri/output_freesurfer_5_3/3_012_PRG/stats/rh.aparc.pial_lgi.stats	3.8468	1.9023	3.5741	2.8634	2.6202	2.712	3.5531	2.6884	2.4296	2.8025	2.4402	2.6967	1.9666	3.4407	2.8473	2.4653	4.154	2.7516	3.5216	2.6882	3.9332	2.2465	3.6445	2.793	1.9544	2.6987	2.3562	3.1151	4.2727	3.8854	1.8187	2.5114	5.0092	4.494
/scratch/imbakker/gmv_gyri/output_freesurfer_5_3/3_013_PRG/stats/rh.aparc.pial_lgi.stats	3.3965	1.6961	3.061	2.3892	2.3229	2.3825	2.9508	2.4581	2.3101	2.3034	2.229	2.3292	1.8509	3.0091	2.5461	2.1622	3.9103	2.8331	3.5519	2.3246	3.5213	1.9211	3.3407	2.4843	1.8121	2.4076	2.0561	2.8109	3.9939	3.4966	1.6851	2.2282	4.6058	3.9615
/scratch/imbakker/gmv_gyri/output_freesurfer_5_3/3_014_PRG/stats/rh.aparc.pial_lgi.stats	3.5842	1.7845	3.0655	2.7487	2.3503	2.3428	3.0066	2.2858	2.3133	2.3604	2.2882	2.4393	1.8746	3.3961	2.4518	2.1155	4.1305	2.8124	3.4978	2.5505	3.3789	1.9031	3.1715	2.6341	1.8336	2.4693	2.1458	2.801	4.3613	3.4209	1.8733	2.1164	5.0763	4.2602
/scratch/imbakker/gmv_gyri/output_freesurfer_5_3/3_015_PRG/stats/rh.aparc.pial_lgi.stats	3.2674	1.6568	2.8112	2.4463	2.6825	2.4041	2.956	2.4188	2.2425	2.3764	2.2979	2.4167	1.8724	2.9921	2.5362	1.9552	3.9883	2.3621	3.4122	2.378	3.1459	1.8188	3.0984	2.3964	1.7885	2.4842	1.9637	2.5959	3.7104	3.3322	1.7483	2.4498	4.1323	3.9195
/scratch/imbakker/gmv_gyri/output_freesurfer_5_3/3_016/stats/rh.aparc.pial_lgi.stats	3.4812	1.7399	3.2026	2.896	2.579	2.574	3.3247	2.6207	2.5253	2.5461	2.1865	2.7079	1.8474	3.2537	2.71	2.1354	4.0287	2.4081	3.7768	2.8066	3.6137	1.987	3.4707	2.7926	1.8902	2.4502	2.1037	2.9451	4.0054	3.7329	1.7322	2.2605	4.832	4.2318
/scratch/imbakker/gmv_gyri/output_freesurfer_5_3/3_016_PRG/stats/rh.aparc.pial_lgi.stats	3.4812	1.7399	3.2026	2.896	2.579	2.574	3.3247	2.6207	2.5253	2.5461	2.1865	2.7079	1.8474	3.2537	2.71	2.1354	4.0287	2.4081	3.7768	2.8066	3.6137	1.987	3.4707	2.7926	1.8902	2.4502	2.1037	2.9451	4.0054	3.7329	1.7322	2.2605	4.832	4.2318
/scratch/imbakker/gmv_gyri/output_freesurfer_5_3/4_002_PRG/stats/rh.aparc.pial_lgi.stats	3.2502	1.8952	2.9636	2.7574	2.6861	2.5784	2.9516	2.5516	2.7052	2.2616	2.5378	2.7137	1.9921	3.0786	2.7734	2.2359	4.366	3.0295	4.2227	2.6493	3.4433	2.1055	3.3611	2.707	2.0669	2.7538	2.1921	2.6668	4.3845	3.4954	1.9988	2.4617	5.141	4.7541
/scratch/imbakker/gmv_gyri/output_freesurfer_5_3/4_004_PRG/stats/rh.aparc.pial_lgi.stats	3.4474	1.7919	2.8467	2.8688	2.6702	2.6042	3.2037	2.5762	2.5108	2.5173	2.4493	2.7422	1.8725	3.1837	2.7789	2.2607	4.267	2.7968	3.4546	2.7368	3.4322	2.0291	3.3694	2.8369	1.8671	2.4684	2.0127	3.0483	4.1036	3.4613	1.8855	2.5788	4.6897	4.1628
/scratch/imbakker/gmv_gyri/output_freesurfer_5_3/4_005_PRG/stats/rh.aparc.pial_lgi.stats	3.2291	1.6884	2.8029	2.7053	2.4899	2.4033	2.8765	2.3999	2.4033	2.4085	2.3829	2.4359	1.7946	2.9148	2.6072	2.17	3.7683	2.7513	3.1634	2.4895	3.0755	1.9962	3.0428	2.5946	1.7606	2.2496	1.9141	2.73	3.6975	3.1704	1.6635	2.2491	4.0687	3.9979
/scratch/imbakker/gmv_gyri/output_freesurfer_5_3/4_007_PRG/stats/rh.aparc.pial_lgi.stats	3.2598	1.7818	3.0238	2.7569	2.5157	2.6005	2.9605	2.413	2.5468	2.4255	2.3386	2.6033	1.8881	2.8991	2.8646	2.2259	4.3646	2.9511	3.6609	2.5471	3.2369	2.0627	3.2357	2.6778	1.8696	2.5248	2.1074	2.744	4.1044	3.4059	1.9633	2.2555	4.8636	4.3078
/scratch/imbakker/gmv_gyri/output_freesurfer_5_3/4_008_PRG/stats/rh.aparc.pial_lgi.stats	3.4032	1.6648	3.0034	2.6575	2.3647	2.3609	3.1494	2.3987	2.1733	2.54	2.1787	2.3808	1.8693	3.0708	2.5025	2.1706	4.2676	2.5981	3.1599	2.4688	3.5655	1.825	3.3498	2.6244	1.8338	2.5298	2.0498	2.9391	3.9271	3.5685	1.843	2.1095	4.5844	4.2123
/scratch/imbakker/gmv_gyri/output_freesurfer_5_3/4_011_PRG/stats/rh.aparc.pial_lgi.stats	3.4897	1.8756	3.3306	2.7115	2.7975	2.6603	3.1603	2.5661	2.626	2.4973	2.4563	2.6941	2.0583	3.107	2.8598	2.0834	4.5056	2.5503	3.6804	2.6546	3.5459	1.9928	3.467	2.6292	2.0236	2.6334	2.147	2.8979	4.165	3.7172	1.9755	2.4205	5.1141	4.4223
/scratch/imbakker/gmv_gyri/output_freesurfer_5_3/4_014_PRG/stats/rh.aparc.pial_lgi.stats	3.2851	1.807	3.081	2.5693	2.3633	2.5079	2.9145	2.4892	2.4465	2.4144	2.4049	2.5242	1.866	3.1773	2.6315	2.1348	4.5166	3.0001	3.4458	2.5225	3.433	1.9443	3.2505	2.6021	1.8307	2.6201	2.0392	2.6433	4.0911	3.7356	1.9022	2.2983	4.4483	4.1153

## Sheet: segmentation_stats
X1	X2	X3	X4	X5	X6	X7	X8	X9	X10	X11	X12	X13	X14	X15	X16	X17	X18	X19	X20	X21	X22	X23	X24	X25	X26	X27	X28	X29	X30	X31	X32	X33	X34	X35	X36	X37	X38	X39	X40	X41	X42	X43	X44	X45	X46	X47	X48	X49	X50
	Left-Lateral-Ventricle	Left-Inf-Lat-Vent	Left-Cerebellum-White-Matter	Left-Cerebellum-Cortex	Left-Thalamus-Proper	Left-Caudate	Left-Putamen	Left-Pallidum	3rd-Ventricle	4th-Ventricle	Brain-Stem	Left-Hippocampus	Left-Amygdala	CSF	Left-Accumbens-area	Left-VentralDC	Left-vessel	Left-choroid-plexus	Right-Lateral-Ventricle	Right-Inf-Lat-Vent	Right-Cerebellum-White-Matter	Right-Cerebellum-Cortex	Right-Thalamus-Proper	Right-Caudate	Right-Putamen	Right-Pallidum	Right-Hippocampus	Right-Amygdala	Right-Accumbens-area	Right-VentralDC	Right-vessel	Right-choroid-plexus	5th-Ventricle	WM-hypointensities	non-WM-hypointensities	Optic-Chiasm	CC_Posterior	CC_Mid_Posterior	CC_Central	CC_Mid_Anterior	CC_Anterior	BrainSegVol	BrainSegVolNotVent	BrainSegVolNotVentSurf	lhCortexVol	rhCortexVol	CortexVol	lhCorticalWhiteMatterVol	rhCorticalWhiteMatterVol
/scratch/imbakker/gmv_gyri/output_freesurfer_5_3/1_002_PRG/output/data/stats/aseg.stats	9488.3	196.9	14975.5	58381.5	7527.1	4447.2	5919.6	1737.3	1253.4	3006.7	20563.1	4545.5	1390.4	1391.1	594.2	4192.2	27.1	1796.6	11788.2	321.4	14982.5	58485.9	6700.6	4256.2	5714.8	1748.1	4660.9	1396.9	564.9	4061.2	30	1656.5	21	1449.8	12.4	126.2	958	365.6	465.7	489.1	996.2	1227485	1197086	1.19676e+06	248860	258897	507757	236880	244921
/scratch/imbakker/gmv_gyri/output_freesurfer_5_3/1_003_PRG/output/data/stats/aseg.stats	5793.1	218.4	13291.9	59781.5	8707	3971	6019	1584.1	1066.7	1870.2	19611.7	5002.5	1745.7	1039.3	708.8	4107.3	0	1322.2	6268.3	281.9	13805	58110.4	8141.9	4105.1	5576.5	1723.9	4978	1858.1	670	4304.2	59.5	1273.7	11.8	1808.7	30.6	120.9	697.5	423.9	408.7	391.6	725.2	1227997	1209444	1.20939e+06	260484	265097	525581	237482	237872
/scratch/imbakker/gmv_gyri/output_freesurfer_5_3/1_005_PRG/output/data/stats/aseg.stats	3823.4	60.1	14490.7	55193.1	7957.5	3876.2	5019.3	1542.1	801.4	1474.3	20443.8	4350.8	1404.8	1263	541.5	3829	4	809.5	3756.3	174.4	14210.8	56612.8	7268.6	3656.1	5535.8	1659.4	4066.8	1501.3	568.7	4005.1	5.8	961.3	17.4	1338.6	5	160.2	1063.6	538.8	750.8	509.2	996.9	1157677	1145315	1.14476e+06	247855	249329	497184	225009	224983
/scratch/imbakker/gmv_gyri/output_freesurfer_5_3/1_006_PRG/output/data/stats/aseg.stats	3254.8	533.3	25149.2	56984.3	8756.3	3522.5	5838.5	1647	1185.4	3330.2	23986.7	4171.5	1438.8	984.9	536.5	4016.5	81.6	783.4	2905.7	77.3	23167.4	58639.3	8030.5	3202.9	5791.5	1670.5	4284.9	1547.8	625.5	4209	54.9	617.3	0	1630.4	89.6	203.1	731.1	364.2	582.8	517.4	723.2	1201404	1188540	1.18812e+06	250460	251880	502340	231659	230353
/scratch/imbakker/gmv_gyri/output_freesurfer_5_3/1_007_PRG/output/data/stats/aseg.stats	7679.2	76.1	11586.7	46756.3	7388.3	4527	5926.9	1793.7	971.2	2436.6	17105.9	4586.4	1524.5	1236.2	799.5	3809.1	53.3	1481.7	6347.9	36.1	11760	49029.9	7447.1	4842.4	5572.8	1674.7	4361.5	1491.3	514.8	3552	59.3	1601.8	7.1	1768.7	12	257.4	548.8	430.6	326.7	320.5	535.5	1130900	1109450	1.10918e+06	243277	246879	490156	219250	219989
/scratch/imbakker/gmv_gyri/output_freesurfer_5_3/1_009_PRG/output/data/stats/aseg.stats	4400.5	219.8	12125.2	49034	7579.2	3591.9	5331.2	1633.8	771.9	2321.3	18242.7	4291.7	1276.7	1160	602.5	3633.9	40.3	1225.5	4511.3	463	10985.8	52327.5	6454.1	3367.7	4839.9	1564.4	4075.6	1466.9	614.2	3203.8	35.1	1095.4	13.6	739.2	6.1	266.6	1035.6	528.8	688.3	629.1	1116	1112550	1097027	1.09664e+06	234043	235870	469913	223294	225090
/scratch/imbakker/gmv_gyri/output_freesurfer_5_3/1_010_PRG/output/data/stats/aseg.stats	2972.9	55.1	16865.7	66597.7	9688.1	4183.5	5604.3	1786.2	704.7	1315	24452.6	4595	1547.5	1348.9	639	4356.1	0	887.7	3994.2	101.7	17289	70182.7	8931.1	4252.1	5791.7	1578.7	5036.8	1552.7	583	4587.6	8.2	871.4	2	1357.6	7.3	197.4	962.1	525.6	737.8	649.1	969.2	1285879	1274652	1.27397e+06	269419	277649	547067	242904	248252
/scratch/imbakker/gmv_gyri/output_freesurfer_5_3/1_011_PRG/output/data/stats/aseg.stats	2720.4	176.1	14831.3	52535.1	7436.3	3289.5	5446.7	1366.3	722.1	1489	20181.2	4629.3	1445.3	1116.2	548	3771.4	52.3	869.7	2445.9	138.1	15323.9	54653.6	6521.9	3020.6	5066	1375.1	4437.8	1348.9	581.5	3673.2	58.3	693.1	0	1445.5	7.4	176.9	857.6	532	562.7	512.1	760.8	1101849	1092311	1.09179e+06	241881	244539	486420	205156	208015
/scratch/imbakker/gmv_gyri/output_freesurfer_5_3/1_012_PRG/output/data/stats/aseg.stats	4715.4	145.1	16187.8	57756.5	8930.9	3490.8	5562.2	1360.2	902.1	2064.1	21762.7	4568.1	1435.3	1153.2	634.7	4282.4	62.5	1019.5	5519.8	71.5	17230.1	56427.9	7591.6	3692.8	5651.5	1667.1	4589.1	1687.7	594.9	4914.5	70	893.9	7.9	1348.5	8.2	101.8	744.6	450.2	459.8	437.8	881.7	1254634	1238854	1.23836e+06	248094	252306	500400	263644	266173
/scratch/imbakker/gmv_gyri/output_freesurfer_5_3/1_013_PRG/output/data/stats/aseg.stats	3460.4	39.4	15802.4	57578.7	7996	3370.3	4960.4	1675.7	622.7	1974.1	22744.9	5214.1	1512.7	1160.8	551.8	4014	55.5	702.5	2545.9	277.3	16561.5	56540.8	7683.2	3271.2	4457.4	1686.7	5283	1495.3	443.4	4149.7	50.6	700.8	9.1	1675.1	9.1	213.3	774	458.9	608	465.1	917.2	1134562	1124030	1.12398e+06	223013	231915	454928	228954	234810
/scratch/imbakker/gmv_gyri/output_freesurfer_5_3/1_015_PRG/output/data/stats/aseg.stats	4891.2	256	14224.3	53969.5	8047.7	3750.2	5405.9	1640.6	879.9	1454.4	20715.3	4665.9	1445.4	1014.6	577.9	4156.9	18.3	1278.6	5148.9	424	14818.8	52022.7	7039	3746	5912.8	1529	4513.5	1408.4	627.8	4405.2	55.9	951	4.9	638.3	3.9	254.2	992.8	508.3	477.7	409.4	919	1156987	1141397	1.14118e+06	237421	241638	479059	233585	234009
/scratch/imbakker/gmv_gyri/output_freesurfer_5_3/1_016_PRG/output/data/stats/aseg.stats	7117.6	70.7	10546.1	38387.6	8840.4	3806.1	5966	1748.9	805.8	1197.2	17571.5	4600.8	1534.1	1338.9	548.7	3741.6	67.1	967.5	5807.1	284.6	13240.6	35564.7	7916.9	3854	6440.2	1679.8	4648.5	1649.5	492.3	3956.3	95.7	1252.8	0	935	10.2	188.5	1163.8	568.8	503.8	452.8	950.9	1138421	1120228	1.11976e+06	228887	230239	459126	251520	249180
/scratch/imbakker/gmv_gyri/output_freesurfer_5_3/1_017_PRG/output/data/stats/aseg.stats	3461.2	25.6	17265.9	56491.2	8877.2	4099.1	5457.9	1455	687.3	1213.9	20046	4708.8	1475.1	1107	923.2	4215.2	127.3	1031.4	3276.5	38	16758.5	57557.1	7780.8	4162.2	5328.5	1713.4	4399.8	1479.9	840.6	4023.9	108.1	796.8	1	1689.5	8.2	172.3	808.3	535.5	769.8	854.7	841.8	1242581	1231799	1.23151e+06	255771	262341	518112	250676	253171
/scratch/imbakker/gmv_gyri/output_freesurfer_5_3/1_018_PRG/output/data/stats/aseg.stats	7490.2	161.6	13311.5	50610.6	7763.6	3488.5	4691.5	1154.4	982.7	2214.1	17628.6	4307.9	1463.2	1145.3	435.7	3569	2.7	1276.3	6908.6	203.1	12902.8	50407.9	6854.5	3535.7	4808	1439.1	4313.9	1271.2	519.9	3659.4	33.5	1082	3.6	855.1	5.7	164.1	800.8	492.1	563.3	639.6	795.2	1057348	1036365	1.03569e+06	216606	217436	434042	209467	210909
/scratch/imbakker/gmv_gyri/output_freesurfer_5_3/1_023_PRG/output/data/stats/aseg.stats	5598.4	242.2	11689.2	47421.2	6929	4002.9	5590.7	1672.7	824.9	1357.3	16801.1	3844.2	1357.2	1088.9	410.3	3698.6	53	1195.1	4250	220.5	12527	47096.7	6471	3604.4	5294.7	1658.3	4230	1355	587.2	3564.9	24.5	1098.2	3.9	979.8	23.6	177.5	824.1	520.5	538.2	399	836.4	1039731	1024610	1.02403e+06	215185	215329	430514	210300	210476
/scratch/imbakker/gmv_gyri/output_freesurfer_5_3/1_024_PRG/output/data/stats/aseg.stats	6027.7	157.1	17370.4	60226.9	9986.5	4115.1	6352.2	1736.5	903.3	1845.6	22745.7	5286.4	1761.9	1678.8	888	4713.4	84.6	1205.3	6537.8	270.5	16532.2	58977	8951.3	4355.7	6195.1	1914.4	5583.3	1621	924.9	4545.6	36.3	1177.7	0	1531.6	6.2	133.7	1099.2	560.1	498.7	567.2	966.1	1437822	1418736	1.41863e+06	301595	307679	609274	292586	295117
/scratch/imbakker/gmv_gyri/output_freesurfer_5_3/1_026_PRG/output/data/stats/aseg.stats	11716.3	239.1	13578.8	50296.1	8369.2	4113	5417.5	1412.1	1204.7	1863	18539.4	4448.4	1706.7	1422.6	465.8	3802.1	44.5	1552.1	15040.1	112.5	15849.9	51726.5	6850.1	4240	5425.7	1671.7	4223.6	1545.5	553.7	3767.4	42.2	1559.7	10	1222	22.5	204.3	1061.5	401.2	393.7	404	933.2	1138476	1104121	1.10386e+06	235574	238785	474359	221713	218501
/scratch/imbakker/gmv_gyri/output_freesurfer_5_3/1_030_PRG/output/data/stats/aseg.stats	3846.6	58.5	17191.3	55020.3	7919.8	3646.7	5236.1	1468.5	685.9	1287.8	21663.6	4865.3	1657.2	1255	721.1	4298.1	48.2	850.4	3758.6	398.9	18101.5	54532.1	7061.4	3685.5	4837.7	1603.1	4600.4	1684.5	513.8	4117.9	54.5	745.9	8.8	703.1	11	115.4	918.2	516.6	669.8	580.3	968.5	1053516	1041453	1.04113e+06	203334	206559	409893	212898	215104
/scratch/imbakker/gmv_gyri/output_freesurfer_5_3/1_039_PRG/output/data/stats/aseg.stats	12374.5	156.5	18967.5	50468.4	9351.6	4160.8	5553.3	1618	1107.6	2539.4	23014.2	4586.1	1773.2	1490.1	544	4343.9	42.3	1110	13876.1	188.2	17731.9	50011.9	7892.2	4513.6	5333.5	1687.5	4654.3	1628.5	596.5	4422.8	265.5	1358.5	10.5	1656	10	195.8	1190.2	536	509.5	683.4	1111.5	1385102	1351538	1.35116e+06	240657	242654	483311	334706	332954
/scratch/imbakker/gmv_gyri/output_freesurfer_5_3/1_040_PRG/output/data/stats/aseg.stats	9981.6	190.1	8776.3	38946.6	9110	4013.8	6153.1	2114.7	1177.3	1630.3	19063	4624	1771.5	1735.4	616.7	4395.2	38.9	1615	15140.6	121.1	9733.9	43205.5	8837.3	4304.6	6110.4	1923.6	4460.6	1720.3	660.2	4355.4	54.2	1411.1	11.4	1371.5	5.5	111.5	962	467.8	516.7	571.4	1130.3	1217015	1184283	1.18426e+06	253850	261443	515292	246487	255720
/scratch/imbakker/gmv_gyri/output_freesurfer_5_3/1_041_PRG/output/data/stats/aseg.stats	9245.2	115.5	13188	43989.4	7220	3880.2	5452.4	1633.8	1081.5	976	17522.1	4237.9	1455.9	1103.1	478.6	3518.8	69.2	1295.5	8648.1	263.5	14301.1	48415.9	7018.8	3859.5	5104.5	1352.1	4265.7	1416.4	597	3828.8	39.8	1393.7	4.3	750.6	5.1	235	827.3	490.9	466.3	445.6	755.6	1067425	1043533	1.04302e+06	230783	232700	463483	201444	202187
/scratch/imbakker/gmv_gyri/output_freesurfer_5_3/1_042_PRG/output/data/stats/aseg.stats	19443.6	509.7	11762.3	49618.3	7753.3	4417.3	6272.1	2009.9	799.8	1679.2	17543.8	4403	1459.3	932.2	581.6	4110.9	55	2050.6	15434.8	202.2	14052.5	51059.5	7406.8	4318.4	6309.4	1705.6	4152	1507.3	655.6	4145.6	45.3	1614.2	10.3	1409.2	10.6	153.8	958.5	390.3	419.4	470.4	1202.8	1157790	1115171	1.11496e+06	238222	243113	481334	219905	225653
/scratch/imbakker/gmv_gyri/output_freesurfer_5_3/1_043_PRG/output/data/stats/aseg.stats	7876.4	107.6	15300.5	40300.4	7491.5	4032.6	6272.2	1803.6	682.3	1801.4	18164.8	4241.9	1769.2	886.3	637.2	4230.1	39	813.2	4486.6	169.4	16177.3	41114.5	7467.2	4194.2	5465.4	1730	4633.4	1618.6	617.9	4143.4	72.8	1012.5	15.3	708.4	4	102	960.9	417.1	532.5	519.6	1004.7	1082073	1064882	1.06463e+06	222119	224728	446847	221718	222200
/scratch/imbakker/gmv_gyri/output_freesurfer_5_3/1_046_PRG/output/data/stats/aseg.stats	6701.2	165.2	10307.7	40036.6	6770.5	4298.1	5910.3	1626.5	962.2	1524.3	16178.7	4273.5	1760.7	944.8	475	3552	18.8	969.8	5794.3	148	10506.5	41311.3	6436.8	3993.7	5381	1530.6	4299.6	1423	597.7	3705.6	15.9	1002.1	8.6	773.7	6.5	130.6	1128.2	623	517	586.5	989.8	1031186	1013414	1.01298e+06	224674	226265	450939	202216	201426
/scratch/imbakker/gmv_gyri/output_freesurfer_5_3/2_023_PRG/output/data/stats/aseg.stats	5189.2	163.7	15236.7	57337.2	8244.8	4129.6	6241	1927.9	888.6	1664.8	20218.5	4253.6	1521.3	1168.4	598.9	4026	14.2	922.4	5289.8	164.3	15566.5	59261.8	7617.5	4449.7	5728.1	1615.9	4527.3	1543.6	686	4428.3	28.2	1238.5	0	1162.5	3	112.9	978	543.2	481.7	542.2	925.4	1268001	1252105	1.25162e+06	285134	287538	572672	234000	235962
/scratch/imbakker/gmv_gyri/output_freesurfer_5_3/2_024_PRG/output/data/stats/aseg.stats	4505.8	352.5	16021.7	58735.3	9029.9	3859	6980.5	2345.9	793.2	1615.5	22796.1	4853.3	1788.9	1532.7	650.9	4825.3	70.8	1387.1	4930.2	475.5	16070	60393	9025.1	4025.9	6263.7	2099.6	5095.1	1878.3	735.6	4987.7	98	1161.8	34.3	1582.5	4.8	115	1004.1	465.3	490	430.6	892.3	1209794	1193794	1.19373e+06	235968	240362	476330	246112	250220
/scratch/imbakker/gmv_gyri/output_freesurfer_5_3/2_025_PRG/output/data/stats/aseg.stats	5043.1	89.6	15488.8	64682.8	7705.2	3544.7	6152.2	1706.2	1054.6	2104.1	19549	4649.3	1612.3	1135.5	610.9	3719.6	69.4	955.8	5763.6	132.1	15069.8	63554	7161.5	3772	5845.7	1399.4	4567	1500.7	607.6	4055.4	53	981.7	9.7	670.5	12.1	221.5	1010	634.5	633.8	617.7	1106.6	1197888	1181351	1.18137e+06	250056	252239	502295	230015	231263
/scratch/imbakker/gmv_gyri/output_freesurfer_5_3/2_027_PRG/output/data/stats/aseg.stats	11886.6	519.9	15571.5	69201.7	8659.1	3727	5048	1843.6	1197.3	1736.1	22217.9	4213.4	1468.5	1647.1	382.4	4178	35.3	1633.9	15054.1	700.2	16729.2	71834	8285.6	3933.4	4881.3	1591	3996.6	1729.4	584	4685.1	42.7	1653.3	6.4	1197.5	7	54.3	1152.5	442.3	381.1	399.7	1013.9	1318986	1283269	1.28326e+06	275130	278654	553783	248275	248617
/scratch/imbakker/gmv_gyri/output_freesurfer_5_3/2_028_PRG/output/data/stats/aseg.stats	8789.1	379	12496.3	57827.5	7375.3	3578.7	5406.4	1567	1545	5114.1	18452.8	4410.6	1585.9	1033.3	744	3799.5	60	1249.6	10579.7	532.7	13144.8	61664.1	6924	3927.8	5105.3	1468.4	3902.9	1452.5	574.5	3948.1	46.6	1563.5	1	1193.5	14.4	244.4	818	531.2	428.5	419.2	857.1	1179973	1149449	1.14931e+06	248547	248873	497420	224997	225852
/scratch/imbakker/gmv_gyri/output_freesurfer_5_3/2_029_PRG/output/data/stats/aseg.stats	3024.3	467.7	15182.2	46520.7	9313	4273.8	5330.1	1628.9	619.2	1499.5	21980	4389.8	2261.1	834.9	717.6	4411.3	96.9	843.2	2198.3	1577.7	15703.8	47341.4	8253.5	3860.8	6037.7	1485	4787.9	2135.8	728.6	4795.9	30.5	642.9	1	1535.2	7.5	175.2	1078.6	612.7	614.7	759.9	984.9	1198837	1188150	1.18782e+06	235951	242257	478208	257679	261875
/scratch/imbakker/gmv_gyri/output_freesurfer_5_3/2_030_PRG/output/data/stats/aseg.stats	4153.5	119.4	15824.6	57163	8688.2	4223.7	6269.8	1618.8	729.2	1685.8	22241.5	4847	1732.9	1077.5	575	4592	40.7	1114.3	4800.1	46.1	16546.7	55703.3	7694.5	3979	6169	1742	4802	1439.2	724.3	4694	73.5	1049	18.4	1369.5	3.3	102.5	1073.2	592.9	788.3	674.7	1080.7	1229647	1215645	1.21531e+06	248116	249079	497194	255936	253403
/scratch/imbakker/gmv_gyri/output_freesurfer_5_3/2_031_PRG/output/data/stats/aseg.stats	5251.5	146	16627.8	68281.9	10163.2	4084.9	6358.9	1850.5	864.3	1786.9	24427	5054.6	1874.6	1188.2	463.9	4099.9	32.1	1135.6	4231.6	290.7	17127.8	69318.1	9066.9	3960	6104.4	1733.1	5221.6	1963.7	576.5	4550.7	49.5	1367	1.7	1824.7	3.8	114	848.2	454.5	546.7	437	812.2	1325264	1309794	1.30894e+06	275453	278420	553873	261824	254978
/scratch/imbakker/gmv_gyri/output_freesurfer_5_3/2_032_PRG/output/data/stats/aseg.stats	3018.6	205.9	18432.2	60096.5	8631.9	3464.9	6712.8	1418.2	884.9	1620.1	22949.4	5166.3	1788.3	989.3	629	4247.5	119.9	792.7	4994.8	83.5	18955.6	60316.2	7693.8	3076.1	5573.7	1628.4	4959.1	1635.1	550.8	4099.8	120.5	807.7	7.8	2697	9.7	166.6	776.4	596	694.6	472.7	891.7	1279851	1267257	1.26688e+06	253937	260948	514884	262991	269219
/scratch/imbakker/gmv_gyri/output_freesurfer_5_3/2_033_PRG/output/data/stats/aseg.stats	4682	25.5	16351.8	49948.1	8714.1	3899.5	4977.6	1338.5	776.9	2093.9	20778.2	3730.2	1423.9	650.9	641.3	4035.1	33.8	870.7	5917.1	26.3	16307.3	50075.1	6947.6	4109.1	5098	1495.2	3716.4	1217.8	619.5	3985.3	63.1	686.7	4.7	1193.5	3	193.9	869.2	371.1	465.7	494.3	593.4	1089063	1073963	1.07351e+06	209039	208645	417684	233576	233199
/scratch/imbakker/gmv_gyri/output_freesurfer_5_3/2_034_PRG/output/data/stats/aseg.stats	4350.2	212.9	18567.7	62345.9	8520.2	3840.7	6606.8	1405.2	677.3	1795.8	21554	4233.3	1382.4	1123.9	646.9	3936.2	35.9	1354.8	4153.2	186.3	19926	62794.7	7516.1	3592.5	5908	1822.3	4251	1452.9	710	3962.8	32.5	1112.4	1.4	1385.1	5.4	226.5	1005.8	533.3	512.1	482.9	871	1118778	1104694	1.10417e+06	216259	221329	437588	220489	222427
/scratch/imbakker/gmv_gyri/output_freesurfer_5_3/2_035_PRG/output/data/stats/aseg.stats	7428.6	125.2	16130.7	55499.1	10268.1	4355	7683.5	2277.9	1254.6	1940.9	22853.8	5019.6	1861.1	1271.3	720.7	4783	55.1	1216.8	7631.6	187.2	16415	55831	9129.8	4571.1	7499.4	1990.2	5421.1	2020.3	675.3	4676.7	81.7	1363.1	5.3	1049.8	24.7	200.1	1070.6	602.7	516.1	526.9	1020.6	1416055	1394568	1.3943e+06	293077	297941	591018	293184	292972
/scratch/imbakker/gmv_gyri/output_freesurfer_5_3/2_036_PRG/output/data/stats/aseg.stats	3745.2	51	14705.8	58704.6	8097	3856	5354.9	1200.6	933.8	1229.1	19931.9	4553.6	1789.2	1125.4	640.8	3882.3	70.5	819.4	3298.3	678	14809.7	61317.9	7293.1	3232.7	4849.4	1511.7	4723.1	1702.1	539.9	3816.5	98.9	805.4	0	2541	5	69.1	715.3	388.6	618.3	411.5	649.7	1170217	1158370	1.15798e+06	241089	239301	480390	234559	236392
/scratch/imbakker/gmv_gyri/output_freesurfer_5_3/2_050_PRG/output/data/stats/aseg.stats	6153.4	317.9	14996.5	60050.7	8801.3	4059.3	5591.6	1564.5	857	1838.3	19422.8	4820.3	1819.2	1218.4	538	4058.4	8	1127.7	5085.7	112.1	16532.1	60378.5	7895.2	4115	5262.9	1768.6	4726.8	1763.8	607.8	3737.9	21.5	1192.6	11.7	1134.1	14.4	125.1	949	521.3	494.5	414.2	871.7	1233749	1216546	1.21622e+06	268978	276474	545452	226237	230707
/scratch/imbakker/gmv_gyri/output_freesurfer_5_3/2_054_PRG/output/data/stats/aseg.stats	12637	248.6	14202	63814.3	10287.1	4625.6	5425.6	1564.2	976.8	1404	21520.3	5653.3	1491.3	1395.9	678.1	4606.2	31.7	1854.9	11165.6	304.3	15494.6	61772.3	8947.4	4758.2	5875.6	1871.8	5271	1719.8	820.6	4582.1	14.9	1578.1	19.8	1373.4	10.8	180.9	1140.7	506.8	537.6	540.7	1075.2	1372720	1341687	1.34131e+06	281871	287915	569786	271448	276319
/scratch/imbakker/gmv_gyri/output_freesurfer_5_3/2_055_PRG/output/data/stats/aseg.stats	7402.9	198.8	13792.4	48591.7	7764.6	4273.1	5225	1340.2	768.2	2603.8	17027	3870.9	1632.7	1301.9	473	3473.2	25.3	1314.8	11649.9	205.5	13312.3	49163.6	6937.4	4193.2	4981	1471.4	4022.2	1372.3	605	3583.9	18.7	1458.8	7.8	925.8	3.6	33.4	845.9	393	404.2	414.3	826.5	1004962	978715	978315	206126	208830	414956	191429	191732
/scratch/imbakker/gmv_gyri/output_freesurfer_5_3/3_001_PRG/output/data/stats/aseg.stats	16913.3	333.4	9912.5	37925.1	6948.1	3366.8	5257.4	1210.6	569	1330.8	15034.1	2059.1	1042.3	1049.2	318.7	3126.1	0	1682.6	13313	431.5	9919.9	39516.9	6517.2	4000.1	5108.8	1397.3	3470	1578.6	409.5	3324.3	6.2	2201.5	8.7	2532.9	16.6	25.2	980.3	419.4	533.7	335.4	1056.3	942641	905045	904490	199733	203893	403626	175947	177850
/scratch/imbakker/gmv_gyri/output_freesurfer_5_3/3_003_PRG/output/data/stats/aseg.stats	2993.6	48.6	15520.8	46628.1	8949.7	3198.6	4439.7	1245.8	618.1	1985.9	18666.9	4371.8	1553.7	1151.2	439.5	3214.1	0	916.3	3562.1	473	17791.8	46389.1	7931.7	3149.3	3459.3	1230	3966.3	1301.3	543.1	3345.8	38.3	636.4	1.5	925.9	5	66.4	1196.4	703.9	872.7	1194.8	911.5	1064114	1052545	1.05145e+06	214798	221763	436560	216261	219456
/scratch/imbakker/gmv_gyri/output_freesurfer_5_3/3_004_PRG/output/data/stats/aseg.stats	4703.6	170.3	11056.4	42758.4	7979	3535	5183.9	1647.4	782.9	2454.1	17408	4977.7	1657.5	1293.8	683.1	4046.9	29.6	1020.7	4355.5	181	12618.7	49017.4	7563.9	3939.3	5236.1	1536.4	5087.4	1682.1	695.5	4467.8	18.7	885.8	12.8	774.2	9.8	96.5	900.2	424.6	521	456	991.1	1082407	1067273	1.06678e+06	222760	233825	456586	213079	221152
/scratch/imbakker/gmv_gyri/output_freesurfer_5_3/3_005_PRG/output/data/stats/aseg.stats	9962.7	320.4	10505.1	38838.2	8184.1	3808.1	5018.7	1397	1072.8	1665.5	15374.3	4091.1	1591.8	1379.7	459.9	3760	15.4	1527.1	8463.7	316.8	8168.1	39776.2	7992.9	3895.8	4829.7	1428.9	4007.9	1459.3	539.6	3598.7	33.3	1959.4	19	796.9	6.6	270.5	942.6	338	436.4	446.4	983.8	1061729	1035536	1.03532e+06	222271	224510	446781	217928	217174
/scratch/imbakker/gmv_gyri/output_freesurfer_5_3/3_006_PRG/output/data/stats/aseg.stats	8433.6	242.2	10896.2	37768.2	7433.3	4224.9	5270.6	2036.1	1322.8	2174.2	16919.4	4354.5	1615.5	1655.1	694.6	3911.7	13.7	1677.7	10306	409.3	10766.4	39256.9	6767.9	4398.5	5797	1549.4	3914	1501.1	665.7	3982.6	18.9	1937.2	9.2	603.8	22	273.6	998.6	486.4	505.3	492.1	970.6	979909	952099	951524	202284	204205	406489	192077	195491
/scratch/imbakker/gmv_gyri/output_freesurfer_5_3/3_007_PRG/output/data/stats/aseg.stats	24248	954.1	11805.1	39263.2	7824.9	3381.8	4473.7	1560.9	892.3	1128.9	14657.1	4596.1	1527.4	1501.9	532.8	3272.3	44.7	1332.6	15605.2	460.5	11476.7	39080.1	7203.4	3857.1	4253.9	1098.2	4272.5	1452.6	609.5	3429.6	37	1814.4	1	1344.3	24.2	215.2	1413.3	458.1	364.7	433.5	932.4	1051341	1003296	1.00293e+06	200841	206282	407122	220203	219612
/scratch/imbakker/gmv_gyri/output_freesurfer_5_3/3_009_PRG/output/data/stats/aseg.stats	6341.4	274.3	10439.8	37071.3	7570.6	3737.2	4695.9	1775.3	812.1	1248.1	14403.7	3282.3	1525	1010.8	452.4	2958.3	8.2	1230.7	4272.5	427.5	10965	39498	6614.7	3508.5	4411.9	1575.8	3792.8	1506.9	601.7	3129.1	50	988.6	7.7	550.3	3.4	93	1044.8	541.8	499.4	536.5	1106.7	931731	915608	915118	209947	210414	420361	174082	171092
/scratch/imbakker/gmv_gyri/output_freesurfer_5_3/3_011_PRG/output/data/stats/aseg.stats	9436.1	288.4	11768.8	39765.9	8747.8	3688.3	6593.4	1787.1	1073.9	1460.1	18721	5025.9	1766.7	1529.9	894.3	4303.5	90.6	2156.5	12775.9	209.5	11665.8	42931.3	8441.9	4030.3	5701.3	1828.3	4776.3	1821	774.4	3875.9	99.1	2130.8	5.8	1481.6	15.5	195	903.3	427.2	401	428.2	1017.9	1186166	1155410	1.15497e+06	240414	241046	481460	249253	252972
/scratch/imbakker/gmv_gyri/output_freesurfer_5_3/3_012_PRG/output/data/stats/aseg.stats	7510.4	100.2	14916	53908.9	8540.7	4012.9	5620.7	1957.9	1111.1	1308.5	20479.4	4694.9	1647.1	1278.3	766.2	4062.1	37	1592.8	11630.4	487	15587.5	57047.8	7896.4	4337.4	6197.6	1615.7	4480.4	1916	795	4276.1	206.2	1719	17	1285.6	8.4	166.4	1094.6	678.1	794.1	474.5	1505.7	1238700	1212408	1.21145e+06	269776	278948	548724	224385	232907
/scratch/imbakker/gmv_gyri/output_freesurfer_5_3/3_013_PRG/output/data/stats/aseg.stats	5679.1	389.9	11971.6	50077.9	7035.1	4355.8	5216.6	1568.8	962.1	1773.1	17616.6	3821.2	1361.9	942.2	664.9	3830.9	12.2	1372.8	6748	247.7	12173.8	51503.4	6770.9	4743.6	5386.9	1525.4	3785.4	1392.5	676.1	3911	13.1	1363.6	35.5	645.8	5	134.4	904.2	457.7	483.2	432.8	1047.2	1026883	1007864	1.00769e+06	207312	219239	426550	197768	200960
/scratch/imbakker/gmv_gyri/output_freesurfer_5_3/3_015_PRG/output/data/stats/aseg.stats	12863.3	384.3	8035.9	31689.1	6896.2	4682.4	4781.1	1877.9	977.3	1245.3	13357.5	3879.1	1478.6	1292.6	571.5	3764.3	25.6	1771.5	9945.5	449.6	8969.4	29952.8	7110.5	4886.6	4611.7	1647.2	4050.5	1633.5	656.1	3684.1	55.9	2093.5	21.8	954.5	8.8	94.5	1278	515.4	548.7	493.3	1110	1067191	1036490	1.03575e+06	227089	228589	455678	223943	220450
/scratch/imbakker/gmv_gyri/output_freesurfer_5_3/4_001_PRG/output/data/stats/aseg.stats	10728.2	178.9	11185	52785.6	6748	3142.1	4366.3	1476.2	832.1	2278.3	16822.4	4082.7	1419.7	1532	766.2	3698.5	15.6	1228.6	11415.5	231.9	11585.3	51794.6	6282.4	3511.6	4397.2	1152.4	3761.5	1352.6	658.3	3352	4.5	1634.3	10.8	1231.6	13.1	69	1083	435.5	433.8	470.2	1070.5	1020012	990267	989684	203375	211541	414916	194804	201983
/scratch/imbakker/gmv_gyri/output_freesurfer_5_3/4_002_PRG/output/data/stats/aseg.stats	4513	256.5	12189	44682.4	7976.5	3144	4994.3	1705.1	932.2	1838.3	18485.8	4400.3	1856.6	1126.9	606.4	3840.1	104.8	1104.8	6578.5	313.1	10516.2	44445.6	7809.7	3451.2	4815.1	1512.5	4546.1	1813.7	710	4116.1	10.9	1054.7	0	1237.6	6.6	52	1034.4	591.4	526.3	665.8	852.1	1100950	1083908	1.08364e+06	230946	234510	465456	226736	221656
/scratch/imbakker/gmv_gyri/output_freesurfer_5_3/4_003_PRG/output/data/stats/aseg.stats	11528.5	485.3	13678.3	48586.9	7862.8	3112.6	4030.2	1267	1192.6	1072.8	17597.5	3658.5	1590.6	1046.4	466.7	4074.2	0	1608.8	9396	171.2	14131.9	46210.5	7431.9	3191.4	4578	1371.3	4342.7	1587.7	475.6	3977.8	20	1406.8	29.9	825	7.3	130.7	1072.4	500.6	485.4	590.6	1447.1	1074840	1047284	1.04691e+06	210635	214310	424945	223730	222454
/scratch/imbakker/gmv_gyri/output_freesurfer_5_3/4_004_PRG/output/data/stats/aseg.stats	10731.9	305.9	10608.6	42141.9	9746.1	4397.1	6283.4	2003.8	941.9	1721.8	16331.4	4619	1682.9	1224.2	572.9	4081	98.4	2502.5	14080.8	568.1	6893	41575.1	8421.1	5300.9	5961.3	1925.8	4708.7	1987.1	779.4	4208.8	60.2	1611.3	10.5	1041.5	15	312.5	1363.7	483.7	513.9	502.5	1123	1227366	1194009	1.19329e+06	262640	260003	522642	252809	249166
/scratch/imbakker/gmv_gyri/output_freesurfer_5_3/4_005_PRG/output/data/stats/aseg.stats	3365.2	419.6	11613.7	43792.6	7314.3	3190.5	4363.8	1348.2	689.3	1432.2	13953	3816.2	1490	1287	558.4	3030.1	27.2	840.5	3480.2	117.1	10092.9	44947.3	5994.6	3256.7	5032.9	1359.6	4072.4	1453	663.9	3102.8	74.6	884.3	0	947.4	19.6	151.6	956.6	443.5	447.6	404.5	898.7	916194	904682	904168	189041	192679	381720	179225	182289
/scratch/imbakker/gmv_gyri/output_freesurfer_5_3/4_011_PRG/output/data/stats/aseg.stats	18624.8	756.2	12857.3	41345.7	7525.9	4059.5	5091.5	2166.4	1326.2	1552.2	14560.1	4053	1355	1594.2	581.3	3691.6	87.7	1515.4	18060.3	322.5	11629.2	40788.4	7326	4010.2	5375.7	1384.7	4217.3	1618.4	586	3717.8	35.8	2125.8	16.6	1899.8	16.8	106.4	1101.6	422.3	515.4	536	1206.5	1064499	1018692	1.01807e+06	217219	217503	434722	210367	208834
[truncated: 13 more columns]
